# Development and validation of 58K SNP-array and high-density linkage map in Nile tilapia (*O. niloticus*)

1 **Rajesh Joshi<sup>1,2,\*</sup>, Mariann Árnýasi<sup>1,2</sup>, Sigbjørn Lien<sup>1</sup>, Hans Magnus Gjøen<sup>1</sup>, Alejandro Tola**  
2 **Alvarez<sup>3</sup>, Matthew Kent<sup>1</sup>**

3 <sup>1</sup>Department of Animal and Aquacultural Sciences, Faculty of Biosciences, Norwegian University  
4 of Life Sciences, N-1432, Ås, Norway

5 <sup>2</sup>Equal first authors

6 <sup>3</sup>Genomar Genetics AS, Norway

7 **\* Correspondence:**

8 Rajesh Joshi

9 [rajesh.joshi@nmbu.no](mailto:rajesh.joshi@nmbu.no)

10 **Keywords: Tilapia, linkage map, SNP array, genomics, sex determination, amh, anti-**  
11 **Müllerian hormone**

12 **Abstract**

13 *Despite being the second most important aquaculture species in the world accounting for 7.4% of*  
14 *global production in 2015, tilapia aquaculture has lacked genomic tools like SNP-arrays and high-*  
15 *density linkage maps to improve selection accuracy and accelerate genetic progress. In this paper*  
16 *we describe the development of a genotyping array containing more than 58,000 SNPs for Nile*  
17 *tilapia (*Oreochromis niloticus*). SNPs were identified from whole genome resequencing of 32*  
18 *individuals from the commercial population of the Genomar strain, and selected for the SNP-array*  
19 *based on polymorphic information content and physical distribution across the genome using the*  
20 *Orenil1.1 genome assembly as reference sequence. SNP-performance was evaluated by genotyping*  
21 *4991 individuals, including 689 offspring belonging to 41 full-sib families, which revealed high-*  
22 *quality genotype data for 43,588 of the SNPs. A preliminary genetic linkage map was constructed*  
23 *using Lepmap2 which in turn was integrated with information from the *O\_niloticus\_UMD1* genome*  
24 *assembly to produce an integrated physical and genetic linkage map comprising 40,186 SNPs*  
25 *distributed across 22 linkage groups. Around one-third of the linkage groups showed a different*  
26 *recombination rate between sexes, with male and female map lengths differing by a factor of 1.2*  
27 *(1359.6cM and 1632.9cM respectively), with most linkage groups displayed a sigmoid*  
28 *recombination profile. Finally, the sex-determining locus in this population was mapped to position*  
29 *40.53 cM on linkage group 23, in the vicinity of the anti-Müllerian hormone (*amh*) gene. These new*  
30 *resources has the potential to greatly influence and improve the genetic gain when applying*  
31 *genomic selection and surpass the difficulties of efficient selection for invasive traits in tilapia.*

32

## 33 1 Introduction

34 Nile tilapia (*Oreochromis niloticus*) is an important fresh-water aquaculture species farmed in more  
35 than 100 countries including many developing countries where it is an important source of dietary  
36 protein (ADB, 2005). Thanks to its fast growth, short generational interval (5 months), relatively  
37 small size, adaptability to different environments, and ease to work with, it is also used as a model  
38 species for research into fish endocrinology (Seale et al., 2002), physiology (Vilela et al., 2003;  
39 Wright and Land, 1998), and evolutionary and developmental biology (Fujimura and Okada, 2007).  
40 Nile Tilapia production is supported by more than 20 breeding programs based mainly in South  
41 East Asia (Neira, 2010). Most of the commercial and farmed Tilapia strains are derived from the  
42 genetically improved farmed tilapia (GIFT) base strain established in the early 1990s (Eknath et  
43 al., 1993), among these the Genomar Supreme Tilapia (GST®) strain which has undergone more  
44 than 25 generations of selection.

45 So far Tilapia breeding programs have relied on traditional breeding approaches based on easily  
46 measurable phenotypes such as weight and length, and have just recently started to implement  
47 modern genome-based strategies, such as marker-assisted and genomic selection (Meuwissen et  
48 al., 2016). Compared to livestock species, aquaculture has been slower to adopt genome-based  
49 selection tools largely due to a lack of genomic resources such as reference genomes, SNP arrays  
50 and linkage maps. But in species where genomics has been used to guide selection (e.g. rainbow  
51 trout (Gonzalez-Pena et al., 2016; Vallejo et al., 2015), Atlantic salmon (Ødegård et al., 2014; Tsai  
52 et al., 2015) and Common carp (Lv et al., 2016)), there are notable success stories related to disease  
53 resistance (Correa et al., 2015, 2017; Moen et al., 2015; Vallejo et al., 2017) and carcass quality  
54 traits (Gonzalez-Pena et al., 2016).

55 The first genome assembly for *O. niloticus* (released in 2011; Orenil1.0, and updated to Orenil1.1  
56 at the end of 2012 (NCBI, 2018)) was based on short-read sequencing. A newer assembly  
57 (O\_niloticus\_UMD1) was generated using a combination of novel long-reads (generated using  
58 Pacific BioSciences technology) and publicly available Illumina short reads (Conte et al., 2017).  
59 Four linkage maps of varying resolution (Guyon et al., 2012; Kocher et al., 1998; Lee et al., 2005;  
60 Palaiokostas et al., 2013) have also been published, with the most recent map containing 3,802  
61 markers (Palaiokostas et al., 2013). These maps were constructed using markers found with  
62 Restriction-site Associated DNA (RAD) sequencing, microsatellites and/or AFLP markers. The  
63 RAD based strategies usually generate a SNP resource of medium density and are highly efficient  
64 in species where a reference genome is not available (Robledo et al., 2017). In comparison, a SNP-  
65 array offers the advantages of increased genotype accuracy of much higher numbers of markers as

66 well as control over the physical distribution of these across the genome (Robledo et al., 2017). In  
67 this paper, we report the development of a 58K SNP-array (Onil50) and construction of a high  
68 dense linkage map in the commercial strain of Nile Tilapia, Genomar Supreme Tilapia (GST®),  
69 which is the continuation of the widespread GIFT-strain.

## 70 2 Materials and Methods

### 71 2.1 SNP-array (Onil50) development

#### 72 2.1.1 Whole genome sequencing and SNP-detection

73 Genomic DNA from 32 individuals (13 males and 19 females) was extracted from fin-clips  
74 (preserved in Ethanol) using Qiagen DNeasy columns (Qiagen, Germany). DNA quality was  
75 assessed by agarose gel electrophoresis and quantified using a Qubit fluorimeter (ThermoScientific,  
76 USA). After normalization, sequencing libraries were prepared and barcoded using TruSeq sample  
77 preparation kit and sequenced (2 x 125) across 10 lanes on an Illumina HiSeq 2500 (Illumina, USA)  
78 by a commercial provider. At the time this work was carried out, Orenil1.1 Tilapia represented the  
79 highest quality reference genome available (NCBI Assembly *Oreochromis niloticus*:  
80 GCF\_000188235.2\_Orenil1.1\_genomic), and reads were aligned to it using BWA 0.7.12 (Li, 2013)  
81 with default parameters. Putative SNPs were identified using FreeBayes v0.9.20 (Garrison and  
82 Marth, 2012) and filtered using criteria summarized in Figure 1.

#### 83 2.1.2 SNP-filtering

84 The initial set of putative SNPs was divided into 3 groups including SNPs located on scaffolds  
85 assigned to linkage groups, SNPs on unassigned scaffolds, and SNPs detected within the  
86 mitochondrial genome. SAMtools v1.2/bcftools (Li et al., 2009) was then used to filter out variants  
87 according to a series of criteria. First, as an overall quality filter, SNPs with a QUAL score value  
88 (phred) of  $\leq 20$  were removed. Then according to the following criteria, a SNP was removed if; (i)  
89 located within 5bp to an indel, (ii) had more than one alternative allele, (iii) the sequencing depth  
90 exceeded 700 reads, (iv) its alleles were A and T, or C and G, (v) if sample genotype quality was  
91  $< 30$ , (vi) minor allele frequency (MAF)  $< 0.05$ , (vii) all samples were heterozygous, (viii) the  
92 variant was detected in fewer than 28 of the samples sequenced. Finally, Hardy-Weinberg  
93 Equilibrium (HWE) was calculated using PLINK2 (Chang et al., 2015) and SNPs that showed  
94 departure from HWE ( $P < 0.05$ ) were removed.

95

### 96 2.1.3 SNP-selection

97 After filtering, 2.76 million putative high-quality SNPs remained. Based on their relationship to  
98 genes and physical distribution, a subset of these were identified for inclusion on the array. SNPEff  
99 v 4v11 (Cingolani et al., 2012) was used to identify SNPs with moderate and high effects (including  
100 for example non-synonymous variants). From this list of almost 38,000 variants, approximately  
101 10,000 were chosen avoiding SNPs within 10kb of another. A python script was used to fill in gaps  
102 and produce a relatively even distribution of SNPs selected at  $\approx 12$ kb intervals across the 21 linkage  
103 groups, and  $\approx 33$ kb across unmapped scaffolds  $> 50$ kb in length. The script was designed to fill a  
104 distribution gap with a variant falling within a small size selection window with highest minor allele  
105 frequency (MAF) being the main criteria. SNPs from the mitochondrial genome were selected  
106 manually. The selected subset of SNPs were submitted to *in silico* validation for Affymetrix  
107 Bioinformatic Service and based on their recommendation (p-convert value) 58,466 SNPs were  
108 chosen to tile on the array. Upon its release, SNP positions were redefined based on the  
109 O\_niloticus\_UMD1 assembly (Conte et al., 2017) using NCBI's Genome Remapping Service, and  
110 SNPEff v 4.3i was rerun to provide updated annotation information.

## 111 2.2 Genotyping and SNP-performance

112 Genomic DNA was isolated from ethanol-preserved fin clips collected from 4,991 fish (GST®  
113 Tilapia) using Qiagen 96 DNeasy Blood & Tissue Kits according to manufacturer's instructions  
114 (Qiagen, Germany). After quantification and quality checking of DNA, samples were genotyped  
115 on the Onil50 array at Center for Integrative Genetics (CIGENE) in Norway. The complete dataset  
116 of 4,991 samples was analyzed following the Best Practices Workflow described in Axiom Analysis  
117 Suite software (Affymetrix, USA). Four quality parameters were assessed using Axiom Analysis  
118 Suit including: MAF, SNP call rates, Hardy Weinberg (HW) p-values, and clustering. With regards  
119 to the latter, SNP Polisher classifies SNPs into one of 6 different categories based on cluster profiles  
120 with PolyHighRes and NoMinorhom representing the most informative categories. For map  
121 construction, only data from SNPs belonging to these categories and displaying a  $MAF \geq 0.05$  and  
122 an overall call rate  $\geq 0.85$  were used (n= 40,548).

## 123 2.3 Construction of genetic map

### 124 2.3.1 Family structure

125 Genotypes from a subset of 1872 samples was used for map construction. Population 1 (n=1124)  
126 were individuals collected following the branching of the 20th generation, and were factorially  
127 crossed against each other after 2 generations. The experimental design for Population 1 is  
128 described in Joshi et al. (2018) and was primarily intended to partition the non-additive genetic

129 effects in this population. Population 2 (n=748) were obtained from the 24th and 25th generations  
130 of GST®.

131 Parentage assignment was done using an exclusion method which eliminates animals from a list of  
132 potential parents when there are opposing homozygotes between parents and offspring (Hayes,  
133 2011). We permitted a maximum of 100 conflicts between parents and offspring, representing  
134 approximately 0.24% of all genotypes. A total of 689 offspring were divided among 41 full-sib  
135 families containing  $\geq 8$  offspring (mean offspring per family,  $\mu = 16.81$ ). Population 1 (468 offspring  
136 + 19 parents) had 34 full-sib families ( $\mu = 13.77 \pm 5.5$ ) and Population 2 (221 offspring + 14 parents)  
137 had 7 full-sub families ( $\mu = 31.57 \pm 7.23$ ). The structure of Population 1 and 2 is shown in  
138 Supplementary Table 1 and 2.

### 139 **2.3.2 Linkage map construction**

140 Phenotypic sex were known for a subset of families (221 offspring + 33 parents) and was coded as  
141 12 for males and 11 for females and included in the genotype file before running Lepmap2 (Rastas  
142 et al., 2013) for linkage map construction. Lepmap2 uses information from full-sibs to assign SNP  
143 markers to linkage groups (LGs), and applies standard hidden Markov model (HMM) to compute  
144 the likelihood of the marker order within each LGs. First, the SNPs were used to construct the  
145 preliminary linkage map (Build 1), which was used to anchor, order and orient the scaffolds in the  
146 O\_niloticus\_UMD1 assembly and upgrading this assembly to O\_niloticus\_UMD\_NMBU (Conte  
147 et al., 2018). Eventually, the final physical integrated genetic linkage map (Build 2) was constructed  
148 from the order of the markers based on the physical position of the SNPs in  
149 O\_niloticus\_UMD\_NMBU assembly.

### 150 **2.3.3 Build 1: To anchor SNPs to different LGs**

151 SeparateChromosomes (a module in Lepmap2) was run testing lodLimits from 1 - 50 and a  
152 sizeLimit = 100; a lodLimit of 10 resulted in 22 LGs with lowest number of markers not assigned  
153 to any LG. JoinSingles was run to assign single markers to LG groups and tested with lodLimits  
154 from 1 - 15 and lodDifference = 2; a lodLimit of 4 was selected as this joined the highest number  
155 of single markers. OrderMarkers was used to order the markers within each LG. Each LG was  
156 ordered separately and replicated 5 times with commands: numThreads=10 polishWindow=30  
157 filterWindow=10 useKosambi=1 minError=0.15, and the order with highest likelihood was selected  
158 as the best order. For sex averaged map OrderMarkers was run similarly by adding sexAverage=1.

### 159 **2.3.4 Build 2: Integrated linkage map based on the order of the SNPs in the new assembly**

160 Sequence flanking each SNP was used to find the physical position of 40,186 SNPs in the  
161 O\_niloticus\_UMD\_NMBU assembly. Physical position information was used to adjust the order  
162 of the SNPs within respective linkage groups and Lepmap2 was rerun to produce the final linkage  
163 map.

## 164 **3 Results**

### 165 **3.1 SNP selection and array development**

166 The sequencing of 32 tilapia generated 528 million reads representing an average of 16.5x  
167 coverage per individual. On average 98% of reads were mapped to the Orenil1.1 assembly  
168 yielding 12.7 million variants of which 10.5 million were putative SNPs. After performing  
169 multiple steps of filtering based on a markers behavior and amenability to Axiom technology, a  
170 subset of 2.76 million SNPs were retained and further filtered to produce a final set of 58,466  
171 SNPs for which assays were designed and printed in the Onil50 array.

172 The assignment of SNPs to linkage groups and unmapped scaffolds in Orenil1.1 (used for SNP  
173 selection) and O\_niloticus\_UMD1 with 99.8% of the SNPs were successfully re-mapped to the new  
174 assembly (Table 1). Remapping revealed an increase in the number of SNPs mapping to linkage  
175 groups and a corresponding decrease in the number of SNPs on unmapped scaffolds. The average  
176 variant density per linkage group on the Orenil1.1 assembly is 12,5kb. However, since the  
177 O\_niloticus\_UMD1 assembly includes an additional 87 Mb assigned to LGs the average distance  
178 between the variants increased to 15,5kb in this assembly. The most significant difference is a 2.4  
179 fold increase in the physical map size for LG 3 which produced a 2.3 fold increase in the number  
180 of SNPs assigned to this linkage group.

### 181 **3.2 Performance and validation of the SNPs in the array**

182 Performance of the SNPs on the array was further explored with genotyping of 4,858 additional  
183 tilapia samples with call rates exceeding 80%. Axiom Analysis Suite was used to categorize the  
184 SNPs into classes reflecting their cluster profiles. Over 74% of the SNPs were classified as  
185 PolyHighResolution. More detailed information about the sample and SNP statistics are shown in  
186 Figure 2.

187 Running snpEffv4.3i (Cingolani et al., 2012) to predict functional effects of the 58,340 remapped  
188 SNPs from the Onil50 array resulted, in most cases, in multiple annotations per variant. The effects  
189 with the highest putative impact are included for summary in Table 2. The majority of the SNPs  
190 are intronic or intergenic variants, while about 15% of are nonsynonymous mutations. These

191 variants can have direct effect on a trait of interest and are a direct result of the SNP selection  
192 process which specifically targeted variants with a potential functional effect.

### 193 **3.3 Linkage Map**

194 A total of 40,549 SNPs were retained following quality filtering, and 99.78% of these (n = 40,467)  
195 were ordered within the 22 linkage groups corresponding to the karyotype of Nile tilapia  
196 (Supplementary Figure 1). Since, Build 1 linkage map is an intermediate step for the extension of  
197 the O\_niloticus\_UMD1 to the O\_niloticus\_UMD\_NMBU genome assembly (Conte et al., 2018),  
198 and this not the aim of this paper, we give only a brief summary of the results. The genetic and  
199 physical maps were generally in good agreement with a correlation of  $\geq 0.96$  between the reference  
200 genome position and the genetic map position of the SNPs (Supplementary Figure 1). This high  
201 correlation with the physical map demonstrates that the genetic map is of high quality and is highly  
202 accurate.

203 A total of 40,186 SNPs mapped to 22 linkage groups in Build 2 linkage map. The consensus (sex-  
204 averaged) map adds up to 1469.69 cM, with individual linkage group lengths ranging from 56.04  
205 cM (LG19) to 96.68 cM (LG07) (Table 3). The average genetic distance across the LGs was 66.8  
206 cM. The number of markers per LG varied from 1349 to 3391, with an average of 1827 markers  
207 per LG (Table 3). As a consequence of the SNP selection, which sought to position a SNP every  
208 12kb, the number of markers was mostly proportional to the size of the LG (Figure 4). A notable  
209 exception is LG03 where the inclusion of previously unassigned scaffolds has tripled the physical  
210 size without a corresponding tripling of SNP numbers. The SNP density (cM/locus) varied across  
211 the genome, which can be seen in Figure 3 and Supplementary Figures 2-4.

212 In this study, paternal and maternal informative markers were used to construct specific male and  
213 female maps. (Table 3). Around one-third of the linkage groups showed a different recombination  
214 rate between sexes, with male and female map lengths differing by a factor of 1.2 (1359.6cM and  
215 1632.9cM respectively). Generally female maps were found to be larger, with the exception of  
216 LG02, LG06 and LG22. Sigmoidal pattern of recombination, with no recombination at both ends  
217 of the LGs, was seen in almost all linkage groups (Figure 3).

## 218 **4 Discussion**

### 219 **4.1 High-density linkage map for Tilapia**

220 Existing linkage maps for Nile tilapia contain relatively few markers unevenly distributed across  
221 linkage groups (Supplementary Table 3). As a consequence, regions in the genome have poor SNP



222 coverage. By stringently selecting SNPs with an even physical distribution in the genome the  
223 linkage map presented includes 10 times more SNPs and fewer gaps.

224 Ferreira et al. (2010) categorized the karyotypes of *O. niloticus* into 3 meta-submetacentric and 19  
225 subtelo-acrocentric chromosomes. The steepness of the curve in Figure 3 shows the recombination  
226 level, with flat lines representing little or no recombination, which may suggest the possible location  
227 of the centromeres. These notable features, i.e. the wide recombination deserts (areas with no  
228 recombination), are seen in the initial and/or end regions of most of the linkage groups, generally  
229 up to 5 Mb and sometimes up to 10 Mb (e.g. LG09 and LG10), revealing the presence of mainly  
230 subtelo-acrocentric linkage groups. Because of these recombination deserts, most of the linkage  
231 groups, irrespective of the sexes, showed sigmoidal pattern, which is unusual when compared to  
232 other fish species. In channel catfish (Li et al., 2014), salmon (Tsai et al., 2015), Asian seabass  
233 (Wang et al., 2015) and stickleback (Roesti et al., 2013) the recombination rates were generally  
234 elevated towards the end of the linkage groups. The possible explanation might be that the GST®  
235 strain used in this study is derived from the GIFT strain, formed from crossing among four wild  
236 and four cultured Asian strains (Eknath et al., 1993), which might have given us the unique  
237 recombination pattern.

238 Tilapia have been shown to have a sex-specific pattern of recombination with the female map  
239 generally being larger than the male map (Lee et al. 2004). The genetic basis for the differences in  
240 the recombination in different sexes has still not been found, but Li et al. (2014) has listed three  
241 major hypotheses. First, the selection perspective hypothesis (Gruhn et al., 2013; Lenormand and  
242 Dutheil, 2005), proposes that the selection pressure is higher in male gametes compared to female  
243 gametes during the haploid life stage and this male-specific selection leads to decrease in the male  
244 recombination rate to maintain the beneficial haplotypes. Secondly, the compensation hypothesis  
245 (Coop and Przeworski, 2007), proposes that the recombination rate is higher in females compared  
246 to males to compensate for the less stringent checkpoint for the achiasmatic chromosomes. Thirdly,  
247 the recombination pathway hypothesis (Gruhn et al., 2013), suggests that the chromatin differences  
248 established prior to the onset of the recombination pathway causes the differences in the  
249 recombination between the two sexes.

250 LG23 showed a unique recombination pattern, a flat line of around 5 Mb, in the centre of the linkage  
251 group, for which there also is a sex difference in recombination rate. In *O. niloticus*, major XY sex  
252 determining regions have earlier been mapped to LG1 (Palaiokostas et al., 2013) and LG23 (Eshel  
253 et al., 2011, 2012; Karayücel et al., 2004; Shirak et al., 2006). Further, tandem duplication of the  
254 variants of the gene anti-Müllerian hormone (*amh*) in LG23 has been identified as as the male sex

255 determinant in Tilapia (Li et al., 2015). These variants of *amh* gene have been mapped to around  
256 35.4 Mb region of tilapia genome (discussed below in section 4.3), which is the same region where  
257 the unique recombination pattern is seen, suggesting limited recombination around the sex-  
258 determining genes in *O. niloticus*. Further, LG23 was formed by the fusion of two linkage groups  
259 during the evolution of cichlids (Liu et al., 2013), which might be another reason for this unique  
260 recombination pattern.

261 The fusion of the linkage groups during the evolutionary process also has an effect on the size of  
262 the linkage groups, as it is believed that the ancestors of cichlids had 24 chromosome pairs, which  
263 eventually became 22 pairs (Majumdar and McAndrew, 1986). The physical map and the cytogenic  
264 studies indicate LG03 and LG07 consequently became the two largest linkage groups (Conte et al.,  
265 2017; Ferreira et al., 2010; Liu et al., 2013; Poletto et al., 2010), which is also supported by our  
266 genetic map.

## 267 **4.2 Array content and performance**

268 SNP performance was validated by genotyping around 5000 individuals from different generations  
269 of the GST® strain of tilapia. Around 75% of the SNPs on the array perform well generating three  
270 highly differentiated allelotype clusters (i.e. polyhighresolution). Around 9% of the SNPs were  
271 found to depart from HWE ( $p < 0.01$ ), but it has to be noted that the population genotyped for the  
272 validation is the commercial strain that has undergone up to 25 generations of selection. Hence,  
273 these departures might be important as they could represent regions under selection and the outcome  
274 of assortative mating. Whereas the extreme departures might suggest lethal recessive mutations  
275 and/or recent mutations or copy number variants.

276 For future revisions, the array could be improved by increasing the SNP density in highly  
277 recombinant regions of specific linkage groups like including LG03 and LG23. The use of genetic  
278 distance rather than the physical distance to select the SNPs is probably the best option for  
279 equidistant SNP distribution across the genome.

## 280 **4.3 Sex locus mapped in the vicinity of *amh* gene**

281 Sex determination is one of the important aspect in commercial tilapia production, as males are  
282 found to grow faster than females and unisex production is a main method to avoid propagation in  
283 production ponds or cages. Sex determination in fish is more complicated than mammals as it tends  
284 to be co-dependent on both genetic and environmental factors (Baroiller et al., 2009; Ezaz et al.,  
285 2006) . Two main sex determination system exists: XY and ZW, and they are both present in fish  
286 species. It has also been seen that closely related fish species, even in same genus, have different

287 sex determination systems. For example, Blue tilapia, *Oreochromis aureus*, has the ZW system of  
288 sex determination (Campos-Ramos et al., 2001), where males are homogametic (ZZ) and females  
289 are heterogametic (ZW), so the ovum determines the sex of the offspring. Whereas, Nile tilapia (*O.*  
290 *niloticus*) and Mozambique tilapia (*O. mossambicus*) have the XY system of sex determination,  
291 where the males are heterogametic (XY) and females are homogametic (XX), so the sperm  
292 determines the sex of the offspring (Campos-Ramos et al., 2003; Mair et al., 1991).

293 In our study, the sex locus of tilapias was coded using the XY system and mapped to LG23 (Table  
294 4) as reported previously in several studies (Eshel et al., 2011, 2012; Karayücel et al., 2004; Shirak  
295 et al., 2006). The most likely position of sex locus (pos. 34.5Mb/40.53 cM on LG23) maps close to  
296 the anti-Müllerian hormone (*amh*) gene, previously characterized as sex determining gene in Nile  
297 tilapia (Li et al., 2015).

#### 298 **4.4 Implications in commercial tilapia industry**

299 Tilapia is a commercially important aquaculture species, surpassing salmon in terms of production,  
300 with more than 3.9 million tons of fish and fillets being traded in 2015 (FAO, 2017) and more than  
301 20 breeding programs (Neira, 2010). The present SNP array and linkage map has the potential to  
302 greatly improve the genetic gain for this economic important species, and help surpass the  
303 difficulties of efficient selection for the invasive traits, the traits which can't be measured directly  
304 on the candidate broodstock fish, but are only measured on the sibs of the candidates e.g. disease  
305 resistance, fillet yield, etc. These tools may also be useful to bridge the genotype-phenotype gap in  
306 Nile tilapia, which has been pursued for a long time (Gjøen, 2004).

307 A major capability of these resources will be to find economic important QTLs or chromosome  
308 regions affecting economically important traits like disease resistance, fillet traits or feed efficiency.  
309 In order to fine map these QTLs, it is essential to have a high-resolution linkage map. The dense  
310 linkage map can also be integrated with physical maps to position and orient scaffolds along linkage  
311 groups, thereby producing genome assemblies of higher quality.

312 Another important implication will be to facilitate the shift from traditional breeding strategies to  
313 genomic selection in Nile tilapia. The breeding goals in Tilapia will in the future include many  
314 invasive traits. Genomic selection will significantly help us to overcome these challenges,  
315 increasing the profitability and the genetic gain (Hosoya et al., 2017; Houston, 2017; Meuwissen et  
316 al., 2001; Nielsen et al., 2009; Sonesson and Meuwissen, 2009; Vela-Avitúa et al., 2015). Finally,  
317 this will also help to separate the additive and non-additive genetic effects more accurately, thereby

318 increasing both the accuracy of the selection and the possibility to utilize non-additive genetic  
319 effects (Varona et al., 2018).

320 Another obvious use of the SNP-array will be in the parentage assignment. The drawback of the  
321 conventional breeding designs in Tilapia using PIT tags is the confounding of the full-sib family  
322 effects (due to communal rearing of full-sibs) and maternal environmental effects (due to mouth  
323 brooding), making it difficult to detangle the various variance components accurately (Joshi et al.,  
324 2018), which ultimately decreases the accuracy of the selection.

## 325 **5 Conclusion**

326 We present the first SNP-array, the Onil50-array, containing ca 58,000 SNPs for Nile Tilapia, which  
327 was validated in 5000 individuals. Further, we constructed a high density integrated genetic and  
328 physical linkage map, with linkage groups showing sex-differentiated sigmoidal recombination  
329 patterns. These new resources has the potential to greatly influence and improve the genetic gain  
330 when applying genomic selection and surpass the difficulties of efficient selection for invasive traits  
331 in tilapia.

332

333 **6 List of Figures**

334 **Figure 1:** The pipeline for array design, validation and linkage map construction

335 **Figure 2:** Summary of the SNP metrics based on HW p-values, call rate, MAF and the types of  
336 clusters

337 **Figure 3:** Comparison of map positions between genetic and physical maps for different LGs in  
338 Build 2. The y-axis gives the linkage map positions, and the x-axis gives the physical positions.  
339 Linkage groups and the physical positions are based on O\_niloticus\_UMD\_NMBU Assembly. The  
340 maps are color-coded: red for female specific, blue for male specific and black for sex-averaged  
341 linkage maps.

342 **Figure 4:** Plot illustrating the number of SNPs and physical length of linkage group based on  
343 O\_niloticus\_UMD1 Assembly and Build 2 linkage map.

344

345 Table 1: Sequence similarity based assignment of SNPs contained on the Onil50-array to Orenil.1  
 346 and O\_niloticus\_UMD1 genome assemblies.

| Orenil.1 assembly                        |             |          |                            | O_niloticus_UMD1 assembly         |             |          |                            |
|------------------------------------------|-------------|----------|----------------------------|-----------------------------------|-------------|----------|----------------------------|
| LG                                       | Length (bp) | Variants | Variants rate (bp/variant) | LG                                | Length (bp) | Variants | Variants rate (bp/variant) |
| LG1                                      | 31194787    | 2571     | 12133                      | Lg1                               | 38372991    | 2830     | 13559                      |
| LG2                                      | 25048291    | 2043     | 12261                      | Lg2                               | 35256741    | 2395     | 14721                      |
| LG3                                      | 19325363    | 1415     | 13658                      | Lg3                               | 68550753    | 2105     | 32565                      |
| LG4                                      | 28679955    | 2288     | 12535                      | Lg4                               | 38038224    | 2427     | 15673                      |
| LG5                                      | 37389089    | 2927     | 12774                      | Lg5                               | 34628617    | 2549     | 13585                      |
| LG6                                      | 36725243    | 2891     | 12703                      | Lg6                               | 44571662    | 2932     | 15202                      |
| LG7                                      | 51042256    | 4128     | 12365                      | Lg7                               | 62059223    | 4682     | 13255                      |
| LG8-24                                   | 29447820    | 2314     | 12726                      | Lg8                               | 30802437    | 2307     | 13352                      |
| LG9                                      | 20956653    | 1732     | 12100                      | Lg9                               | 27519051    | 1909     | 14415                      |
| LG10                                     | 17092887    | 1414     | 12088                      | Lg10                              | 32426571    | 1878     | 17267                      |
| LG11                                     | 33447472    | 2653     | 12607                      | Lg11                              | 36466354    | 2662     | 13699                      |
| LG12                                     | 34679706    | 2753     | 12597                      | Lg12                              | 41232431    | 2833     | 14554                      |
| LG13                                     | 32787261    | 2647     | 12387                      | Lg13                              | 32337344    | 2275     | 14214                      |
| LG14                                     | 34191023    | 2700     | 12663                      | Lg14                              | 39264731    | 2679     | 14656                      |
| LG15                                     | 26684556    | 2180     | 12241                      | Lg15                              | 36154882    | 2255     | 16033                      |
| LG16-21                                  | 34890008    | 2777     | 12564                      | Lg16                              | 43860769    | 2848     | 15401                      |
| LG17                                     | 31749960    | 2609     | 12169                      | Lg17                              | 40919683    | 2873     | 14243                      |
| LG18                                     | 26198306    | 2075     | 12626                      | Lg18                              | 37007722    | 2307     | 16041                      |
| LG19                                     | 27159252    | 2223     | 12217                      | Lg19                              | 31245232    | 2301     | 13579                      |
| LG20                                     | 31470686    | 2491     | 12634                      | Lg20                              | 36767035    | 2635     | 13953                      |
| LG22                                     | 26410405    | 2083     | 12679                      | Lg22                              | 37011614    | 2272     | 16290                      |
| LG23                                     | 20779993    | 1603     | 12963                      | Lg23                              | 44097196    | 2225     | 19819                      |
| <b>Total</b>                             | 657350972   | 52517    | 12517                      | <b>Total</b>                      | 868591263   | 5621     | 15451                      |
| <b>Unmapped scaffold (n=557)</b>         | 246010115   | 5939     | 41422                      | <b>Unmapped scaffolds (n=284)</b> |             | 2151     |                            |
| <b>Mitochondrial genome</b>              | 16627       | 10       | 1662                       | <b>Mitochondrial genome</b>       | 16627       | 10       |                            |
| <b>Total number of SNPs on the array</b> |             | 58466    |                            | <b>Remapped SNPs in total</b>     |             | 58340    |                            |
|                                          |             |          |                            | <b>SNPs failed to remap</b>       |             | 126      |                            |

347

348

349 Table 2: Summary of annotation for SNPs in the Onil50-array

| SNP categories                                             | Count  | Percent |
|------------------------------------------------------------|--------|---------|
| <b>Total number of SNPs in the array</b>                   | 58,446 |         |
| <b>Annotation Possible</b>                                 | 58,340 | 99.82   |
| <b>Annotation results</b>                                  |        |         |
| Nonsense-mediated decay (NMD)                              | 19     | 0.03    |
| Loss of function (LOF)                                     | 114    | 0.20    |
| Intergenic region                                          | 12,156 | 20.80   |
| Intragenic variant                                         | 126    | 0.22    |
| Intron variant                                             | 21,581 | 36.92   |
| <b>Non-synonymous variant</b>                              |        |         |
| Missense variant                                           | 8,765  | 15.00   |
| Missense variant & splice region variant                   | 263    | 0.45    |
| Stop gained                                                | 16     | 0.03    |
| Stop lost                                                  | 13     | 0.02    |
| Synonymous variant                                         | 1,142  | 1.95    |
| Non coding transcript exon variant                         | 27     | 0.05    |
| Splice acceptor variant & intron variant                   | 9      | 0.02    |
| Splice donor variant & intron variant                      | 13     | 0.02    |
| Splice region variant                                      | 8      | 0.01    |
| Splice region variant & intron variant                     | 163    | 0.28    |
| Splice region variant & non coding transcript exon variant | 7      | 0.01    |
| Splice region variant & synonymous variant                 | 28     | 0.05    |
| Upstream gene variant                                      | 9,231  | 15.79   |
| 3 prime UTR variant                                        | 1,533  | 2.62    |
| 5 prime UTR premature start codon gain variant             | 21     | 0.04    |
| 5 prime UTR variant                                        | 459    | 0.79    |
| Downstream gene variant                                    | 2,646  | 4.53    |

350

351

352

353 Table 3: Marker numbers, length, density and correlations for male, female and sex-averaged Build  
 354 2 linkage map

| LG   | No. of SNPs | Physical length <sup>1</sup> | Length (cM) |       |       | (F:M Length) | Marker density per Mb | Marker density per cM |       |       | Correlation <sup>2</sup> |      |      |
|------|-------------|------------------------------|-------------|-------|-------|--------------|-----------------------|-----------------------|-------|-------|--------------------------|------|------|
|      |             |                              | F           | M     | SA    |              |                       | F                     | M     | SA    | F                        | M    | SA   |
| LG01 | 2112        | 38.37                        | 71.64       | 53.35 | 62.11 | 1.34         | 55.04                 | 29.48                 | 39.59 | 34    | 0.98                     | 0.98 | 0.99 |
| LG02 | 1749        | 35.26                        | 68.22       | 80.97 | 66.27 | 0.84         | 49.60                 | 25.64                 | 21.6  | 26.39 | 0.98                     | 0.99 | 0.99 |
| LG03 | 1349        | 68.55                        | 99.59       | 68.38 | 84.91 | 1.46         | 19.68                 | 13.55                 | 19.73 | 15.89 | 0.91                     | 0.84 | 0.88 |
| LG04 | 1707        | 38.04                        | 60.9        | 62.85 | 61.39 | 0.97         | 44.87                 | 28.03                 | 27.16 | 27.81 | 0.99                     | 0.98 | 0.99 |
| LG05 | 1925        | 34.63                        | 70.2        | 53.59 | 61.02 | 1.31         | 55.59                 | 27.42                 | 35.92 | 31.55 | 0.99                     | 0.99 | 0.99 |
| LG06 | 1948        | 44.57                        | 71.66       | 80.09 | 73.6  | 0.89         | 43.71                 | 27.18                 | 24.32 | 26.47 | 0.99                     | 0.98 | 0.99 |
| LG07 | 3391        | 62.06                        | 132.69      | 67.45 | 96.68 | 1.97         | 54.64                 | 25.56                 | 50.27 | 35.07 | 0.99                     | 0.99 | 0.99 |
| LG08 | 1607        | 30.80                        | 84.18       | 72.48 | 77.72 | 1.16         | 52.18                 | 19.09                 | 22.17 | 20.68 | 0.98                     | 0.98 | 0.99 |
| LG09 | 1564        | 27.52                        | 65.26       | 58.34 | 60.39 | 1.12         | 56.83                 | 23.97                 | 26.81 | 25.9  | 0.97                     | 0.97 | 0.98 |
| LG10 | 1387        | 32.43                        | 63.42       | 56.51 | 59.69 | 1.12         | 42.77                 | 21.87                 | 24.54 | 23.24 | 0.98                     | 0.97 | 0.98 |
| LG11 | 1821        | 36.47                        | 78.49       | 62.87 | 70.07 | 1.25         | 49.93                 | 23.2                  | 28.96 | 25.99 | 0.97                     | 0.99 | 0.99 |
| LG12 | 1979        | 41.23                        | 69.03       | 56.09 | 61.99 | 1.23         | 48.00                 | 28.67                 | 35.28 | 31.92 | 0.98                     | 0.99 | 0.99 |
| LG13 | 1614        | 32.34                        | 72.9        | 54.64 | 62.79 | 1.33         | 49.91                 | 22.14                 | 29.54 | 25.7  | 0.99                     | 0.99 | 0.99 |
| LG14 | 2030        | 39.26                        | 69.67       | 55.02 | 61.99 | 1.27         | 51.71                 | 29.14                 | 36.9  | 32.75 | 0.99                     | 0.98 | 0.99 |
| LG15 | 1836        | 36.15                        | 65          | 54.95 | 58.68 | 1.18         | 50.79                 | 28.25                 | 33.41 | 31.29 | 0.95                     | 0.97 | 0.96 |
| LG16 | 1862        | 43.86                        | 71.61       | 59.94 | 64.36 | 1.19         | 42.45                 | 26                    | 31.06 | 28.93 | 0.99                     | 0.98 | 0.99 |
| LG17 | 2005        | 40.92                        | 68.88       | 60.36 | 63.97 | 1.14         | 49.00                 | 29.11                 | 33.22 | 31.34 | 0.98                     | 0.97 | 0.98 |
| LG18 | 1628        | 37.01                        | 63.14       | 61.85 | 62.1  | 1.02         | 43.99                 | 25.78                 | 26.32 | 26.22 | 0.99                     | 0.99 | 1    |
| LG19 | 1646        | 31.25                        | 64.21       | 50.37 | 56.04 | 1.27         | 52.67                 | 25.63                 | 32.68 | 29.37 | 0.98                     | 0.99 | 0.98 |
| LG20 | 1899        | 36.77                        | 81.26       | 62.64 | 71.31 | 1.3          | 51.65                 | 23.37                 | 30.32 | 26.63 | 0.99                     | 0.99 | 0.99 |
| LG22 | 1643        | 37.01                        | 67.09       | 72.69 | 69.25 | 0.92         | 44.39                 | 24.49                 | 22.6  | 23.73 | 0.98                     | 0.98 | 0.98 |
| LG23 | 1484        | 44.10                        | 73.86       | 54.17 | 63.36 | 1.36         | 33.65                 | 20.09                 | 27.4  | 23.42 | 0.96                     | 0.98 | 0.97 |



## 58K SNP array and high density linkage map for tilapia

|              |              |               |               |               |                |      |       |       |       |       |      |      |      |
|--------------|--------------|---------------|---------------|---------------|----------------|------|-------|-------|-------|-------|------|------|------|
| <b>Total</b> | <b>40186</b> | <b>868.59</b> | <b>1632.9</b> | <b>1359.6</b> | <b>1469.69</b> |      |       |       |       |       |      |      |      |
| <b>Avg</b>   | 1827         | 39.48         | 74.22         | 61.80         | 66.80          | 1.20 | 47.41 | 24.61 | 29.56 | 27.34 | 0.98 | 0.98 | 0.98 |

355 <sup>1</sup>The physical length (Mb) is retrieved from O\_niloticus\_UMD1 Assembly.

356 <sup>2</sup>The correlation between the genetic distance of SNPs (cM) on the linkage map and the physical  
357 distance (bp) according to the reference genome assembly.

358 F, M and SA represents female, male and sex-averaged maps respectively.

359

360 Table 4: Mapping of sex-determination locus in the vicinity of the anti-Müllerian hormone (*amh*)  
 361 gene. SNP AX-164998274 (marked as \*) mapped to the same genetic position as the Phenotypic  
 362 sex of the individuals in the Build 1 linkage map.

| SNPs/gene          | LG          | Position (bp)            | Male  | Female | Average |
|--------------------|-------------|--------------------------|-------|--------|---------|
| AX-165032341       | LG23        | 34305951                 | 35.03 | 44.83  | 39.97   |
| AX-164990538       | LG23        | 34306186                 | 35.03 | 44.83  | 39.97   |
| AX-165017655       | LG23        | 34319855                 | 35.03 | 44.83  | 39.97   |
| AX-165032969       | LG23        | 34336514                 | 35.03 | 44.83  | 39.97   |
| AX-165012489       | LG23        | 34351488                 | 35.03 | 44.83  | 39.97   |
| AX-164995826       | LG23        | 34367182                 | 35.24 | 44.83  | 40.00   |
| AX-165001648       | LG23        | 34380102                 | 35.45 | 44.83  | 40.09   |
| AX-165030187       | LG23        | 34380282                 | 35.45 | 44.85  | 40.12   |
| AX-164992183       | LG23        | 34398468                 | 35.45 | 44.88  | 40.13   |
| AX-165006758       | LG23        | 34424845                 | 35.45 | 44.95  | 40.15   |
| AX-164986178       | LG23        | 34437472                 | 35.45 | 45.02  | 40.20   |
| AX-165024637       | LG23        | 34451454                 | 35.45 | 45.61  | 40.53   |
| AX-165013086       | LG23        | 34465412                 | 35.45 | 45.61  | 40.53   |
| AX-164998274*      | LG23        | 34496900                 | 35.45 | 45.61  | 40.53   |
| <b>amh_delta-y</b> | <b>LG23</b> | <b>34491516-34499598</b> |       |        |         |
| <b>amhy</b>        | LG23        | 34491516-34503495        |       |        |         |
| <b>amh</b>         | LG23        | 34491516-34509687        |       |        |         |
| AX-164990628       | LG23        | 34510978                 | 35.45 | 45.61  | 40.53   |
| AX-165031999       | LG23        | 34511701                 | 35.46 | 45.61  | 40.54   |
| AX-165013176       | LG23        | 34525091                 | 35.46 | 45.61  | 40.54   |
| AX-165010851       | LG23        | 34576386                 | 35.46 | 45.61  | 40.54   |
| AX-164993854       | LG23        | 34585587                 | 35.46 | 45.61  | 40.54   |
| AX-164989444       | LG23        | 34598712                 | 35.46 | 45.61  | 40.54   |

363

364

365 **7 Conflict of Interest**

366 *Genomar Genetics AS employs one of the co-author, Alejandro Tola Alvarez. The authors declare*  
367 *that this affiliation in no-way affects the results, discussion and conclusion of the paper.*

368 **8 Author Contributions**

369 HG, AA and MK conceived and designed the study. AA coordinated biological sampling. MK  
370 and MA were responsible for array design and MA performed lab work and initial analysis of  
371 results. RJ constructed the linkage map, while SL integrated the genetic and physical maps. RJ  
372 and MA prepared the draft manuscript which was reviewed and edited by HG, MK, AA and SL.  
373 All authors read and approved the manuscript.

374 **9 Funding**

375

376 **10 Acknowledgments**

377 We would like to acknowledge Anders Skaarud from Genomar Genetics AS. We would like to  
378 thank Harald Grove, Torfinn Nome and Tim Knutsen for their valuable advice and help with  
379 bioinformatics analyses of sequence and SNP data. The SNP array was developed in cooperation  
380 with Affymetrix, Inc., and we particularly thank the following Affymetrix personnel for their direct  
381 contribution: Lakshmi Radhakrishnan and Alessandro Davassi. Similarly, we also acknowledge  
382 Solomon Boison and Luqman Aslam for their interaction during linkage map construction.

383 **11 Data Availability**

384 The whole genome sequence data used for SNP detection was generated using broodstock from a  
385 breeding population and is commercially sensitive. Similarly, the genotypes used for map  
386 construction are from commercial family material. This information may be made available to non-  
387 competitive interests under conditions specified in a Data Transfer Agreement. Requests to access  
388 these datasets should be directed to Alejandro Tola Alvarez [alex@genomar.com](mailto:alex@genomar.com).

389 The assemblies used in this study can be found in NCBI using the following accessions: Orenil1.1=  
390 GCF\_000188235.2, O\_niloticus\_UMD1 = MKQE00000000 and O\_niloticus\_UMD\_NMBU =  
391 MKQE02000000. Linkage map generated from this study can be found in the Figshare:  
392 <https://figshare.com/s/8427b97cf6e623173232>

393

394 **12 References**

- 395 ADB (2005). *An impact evaluation of the development of genetically improved farmed tilapia and*  
396 *their dissemination in selected countries*. Asian Development Bank Available at:  
397 <http://hdl.handle.net/11540/3321>.
- 398 Baroiller, J.-F., D’Cotta, H., Bezault, E., Wessels, S., and Hoerstgen-Schwark, G. (2009). Tilapia  
399 sex determination: where temperature and genetics meet. *Comp. Biochem. Physiol. Part A*  
400 *Mol. Integr. Physiol.* 153, 30–38.
- 401 Campos-Ramos, R., Harvey, S. C., Masabanda, J. S., Carrasco, L. A., Griffin, D. K., McAndrew,  
402 B. J., et al. (2001). Identification of putative sex chromosomes in the blue tilapia,  
403 *Oreochromis aureus*, through synaptonemal complex and FISH analysis. *Genetica* 111.  
404 doi:10.1023/A:1013707818534.
- 405 Campos-Ramos, R., Harvey, S. C., McAndrew, B. J., and Penman, D. J. (2003). An investigation  
406 of sex determination in the Mozambique tilapia, *Oreochromis mossambicus*, using  
407 synaptonemal complex analysis, FISH, sex reversal and gynogenesis. *Aquaculture* 221, 125–  
408 140.
- 409 Chang, C. C., Chow, C. C., Tellier, L. C. A. M., Vattikuti, S., Purcell, S. M., and Lee, J. J. (2015).  
410 Second-generation PLINK: rising to the challenge of larger and richer datasets. *Gigascience*  
411 4, 7.
- 412 Cingolani, P., Platts, A., Wang, L. L., Coon, M., Nguyen, T., Wang, L., et al. (2012). A program  
413 for annotating and predicting the effects of single nucleotide polymorphisms, SnpEff: SNPs  
414 in the genome of *Drosophila melanogaster* strain w1118; iso-2; iso-3. *Fly (Austin)*. 6, 80–92.
- 415 Conte, M. A., Gammerdinger, W. J., Bartie, K. L., Penman, D. J., and Kocher, T. D. (2017). A  
416 high quality assembly of the Nile Tilapia (*Oreochromis niloticus*) genome reveals the  
417 structure of two sex determination regions. *BMC Genomics* 18, 341.
- 418 Conte, M. A., Joshi, R., Moore, E. C., Nandamuri, S. P., Gammerdinger, W. J., Clark, F. E., et al.  
419 (2018). Chromosome-scale assemblies reveal the structural evolution of African cichlid  
420 genomes. *Manuscr. Prep*.
- 421 Coop, G., and Przeworski, M. (2007). An evolutionary view of human recombination. *Nat. Rev.*  
422 *Genet.* 8, 23.
- 423 Correa, K., Bangera, R., Figueroa, R., Lhorente, J. P., and Yáñez, J. M. (2017). The use of  
424 genomic information increases the accuracy of breeding value predictions for sea louse  
425 (*Caligus rogercresseyi*) resistance in Atlantic salmon (*Salmo salar*). *Genet. Sel. Evol.* 49, 15.
- 426 Correa, K., Lhorente, J. P., López, M. E., Bassini, L., Naswa, S., Deeb, N., et al. (2015). Genome-  
427 wide association analysis reveals loci associated with resistance against *Piscirickettsia*  
428 *salmonis* in two Atlantic salmon (*Salmo salar* L.) chromosomes. *BMC Genomics* 16, 854.
- 429 Eknath, A. E., Tayamen, M. M., Palada-de Vera, M. S., Danting, J. C., Reyes, R. A., Dionisio, E.  
430 E., et al. (1993). Genetic improvement of farmed tilapias: the growth performance of eight  
431 strains of *Oreochromis niloticus* tested in different farm environments. *Aquaculture* 111,  
432 171–188.
- 433 Eshel, O., Shirak, A., Weller, J. I., Hulata, G., and Ron, M. (2012). Linkage and physical mapping  
434 of sex region on LG23 of Nile tilapia (*Oreochromis niloticus*). *G3* 2.

- 435 doi:10.1534/g3.111.001545.
- 436 Eshel, O., Shirak, A., Weller, J. I., Slossman, T., Hulata, G., Cnaani, A., et al. (2011). Fine-  
437 mapping of a locus on linkage group 23 for sex determination in Nile tilapia (*Oreochromis*  
438 *niloticus*). *Anim. Genet.* 42, 222–224. doi:10.1111/j.1365-2052.2010.02128.x.
- 439 Ezaz, T., Stiglec, R., Veyrunes, F., and Graves, J. A. M. (2006). Relationships between vertebrate  
440 ZW and XY sex chromosome systems. *Curr Biol* 16. doi:10.1016/j.cub.2006.08.021.
- 441 FAO (2017). *FAO Yearbook. Fishery and Aquaculture Statistics. 2015*. FAO.
- 442 Ferreira, I. A., Poletto, A. B., Kocher, T. D., Mota-Velasco, J. C., Penman, D. J., and Martins, C.  
443 (2010). Chromosome evolution in African cichlid fish: contributions from the physical  
444 mapping of repeated DNAs. *Cytogenet. Genome Res.* 129, 314–322.
- 445 Fujimura, K., and Okada, N. (2007). Development of the embryo, larva and early juvenile of Nile  
446 tilapia *Oreochromis niloticus* (Pisces: Cichlidae). Developmental staging system. *Dev.*  
447 *Growth Differ.* 49, 301–324.
- 448 Gao, Y. U., Zhang, R., Hu, X., and Li, N. (2007). Application of genomic technologies to the  
449 improvement of meat quality of farm animals. *Meat Sci.* 77, 36–45.
- 450 Garrison, E., and Marth, G. (2012). Haplotype-based variant detection from short-read  
451 sequencing. *arXiv Prepr. arXiv1207.3907*.
- 452 Gjøen, H. M. (2004). A new era: The merging of quantitative and molecular genetics—Prospects  
453 for tilapia breeding programs. in *Proceedings of the sixth international symposium on tilapia*  
454 *in aquaculture*.
- 455 Gonzalez-Pena, D., Gao, G., Baranski, M., Moen, T., Cleveland, B. M., Kenney, P. B., et al.  
456 (2016). Genome-Wide Association Study for Identifying Loci that Affect Fillet Yield,  
457 Carcass, and Body Weight Traits in Rainbow Trout (*Oncorhynchus mykiss*). *Front. Genet.*  
458 7.
- 459 Gruhn, J. R., Rubio, C., Broman, K. W., Hunt, P. A., and Hassold, T. (2013). Cytological studies  
460 of human meiosis: sex-specific differences in recombination originate at, or prior to,  
461 establishment of double-strand breaks. *PLoS One* 8, e85075.
- 462 Guyon, R., Rakotomanga, M., Azzouzi, N., Coutanceau, J. P., Bonillo, C., D’Cotta, H., et al.  
463 (2012). A high-resolution map of the Nile tilapia genome: a resource for studying cichlids  
464 and other percomorphs. *BMC Genomics* 13, 222. doi:10.1186/1471-2164-13-222.
- 465 Hosoya, S., Kikuchi, K., Nagashima, H., Onodera, J., Sugimoto, K., Satoh, K., et al. (2017).  
466 Genomic Selection in Aquaculture. *Bull. Jap. Fish. Res. Edu. Agen. No* 45, 35–39.
- 467 Houston, R. D. (2017). Future directions in breeding for disease resistance in aquaculture species.  
468 *Rev. Bras. Zootec.* 46, 545–551.
- 469 Joshi, R., Woolliams, J., Meuwissen, T., and Gjøen, H. (2018). Maternal, dominance and additive  
470 genetic effects in Nile tilapia; influence on growth, fillet yield and body size traits. *Heredity*  
471 (*Edinb.*), 1. doi:10.1038/s41437-017-0046-x.
- 472 Karayücel, I., Ezaz, T., Karayücel, S., McAndrew, B. J., and Penman, D. J. (2004). Evidence for  
473 two unlinked “sex reversal” loci in the Nile tilapia, *Oreochromis niloticus*, and for linkage of

- 474 one of these to the red body colour gene. *Aquaculture* 234, 51–63.
- 475 Kocher, T. D., Lee, W. J., Sobolewska, H., Penman, D., and McAndrew, B. (1998). A genetic  
476 linkage map of a cichlid fish, the tilapia (*Oreochromis niloticus*). *Genetics* 148, 1225–32.  
477 Available at: <http://www.ncbi.nlm.nih.gov/pubmed/9539437> [Accessed September 28,  
478 2017].
- 479 Lee, B.-Y., Hulata, G., and Kocher, T. D. (2004). Two unlinked loci controlling the sex of blue  
480 tilapia (*Oreochromis aureus*). *Heredity (Edinb)*. 92, 543–549. Available at:  
481 <http://dx.doi.org/10.1038/sj.hdy.6800453>.
- 482 Lee, B.-Y., Lee, W.-J., Streelman, J. T., Carleton, K. L., Howe, A. E., Hulata, G., et al. (2005). A  
483 second-generation genetic linkage map of tilapia (*Oreochromis* spp.). *Genetics* 170, 237–44.  
484 doi:10.1534/genetics.104.035022.
- 485 Lenormand, T., and Dutheil, J. (2005). Recombination difference between sexes: a role for  
486 haploid selection. *PLoS Biol.* 3, e63.
- 487 Li, H. (2013). Aligning sequence reads, clone sequences and assembly contigs with BWA-MEM.  
488 *arXiv Prepr. arXiv1303.3997*.
- 489 Li, H., Handsaker, B., Wysoker, A., Fennell, T., Ruan, J., Homer, N., et al. (2009). The Sequence  
490 Alignment/Map format and SAMtools. *Bioinformatics* 25.  
491 doi:10.1093/bioinformatics/btp352.
- 492 Li, M., Sun, Y., Zhao, J., Shi, H., Zeng, S., Ye, K., et al. (2015). A tandem duplicate of anti-  
493 müllerian hormone with a missense SNP on the Y chromosome is essential for male sex  
494 determination in Nile tilapia, *Oreochromis niloticus*. *PLoS Genet.* 11, e1005678.
- 495 Li, Y., Liu, S., Qin, Z., Waldbieser, G., Wang, R., Sun, L., et al. (2014). Construction of a high-  
496 density, high-resolution genetic map and its integration with BAC-based physical map in  
497 channel catfish. *DNA Res.* 22, 39–52.
- 498 Liu, F., Sun, F., Li, J., Xia, J. H., Lin, G., Tu, R. J., et al. (2013). A microsatellite-based linkage  
499 map of salt tolerant tilapia (*Oreochromis mossambicus* x *Oreochromis* spp.) and mapping of  
500 sex-determining loci. *BMC Genomics* 14, 58. doi:10.1186/1471-2164-14-58.
- 501 Lv, W., Zheng, X., Kuang, Y., Cao, D., Yan, Y., and Sun, X. (2016). QTL variations for growth-  
502 related traits in eight distinct families of common carp (*Cyprinus carpio*). *BMC Genet.* 17,  
503 65.
- 504 Mair, G. C., Scott, A. G., Penman, D. J., Beardmore, J. A., and Skibinski, D. O. F. (1991). Sex  
505 determination in the genus *Oreochromis*: 1. Sex reversal, gynogenesis and triploidy in *O.*  
506 *niloticus*. *Theor Appl Genet* 82. doi:10.1007/BF00226205.
- 507 Majumdar, K. C., and McAndrew, B. J. (1986). Relative DNA content of somatic nuclei and  
508 chromosomal studies in three genera, *Tilapia*, *Sarotherodon*, and *Oreochromis* of the tribe  
509 *Tilapiini* (Pisces, Cichlidae). *Genetica* 68. doi:10.1007/BF02424441.
- 510 Meuwissen, T. H. E., Hayes, B. J., and Goddard, M. E. (2001). Prediction of total genetic value  
511 using genome-wide dense marker maps. *Genetics* 157, 1819–1829.
- 512 Meuwissen, T., Hayes, B., and Goddard, M. (2016). Genomic selection: A paradigm shift in  
513 animal breeding. *Anim. Front.* 6, 6–14.

- 514 Moen, T., Torgersen, J., Santi, N., Davidson, W. S., Baranski, M., Ødegård, J., et al. (2015).  
515 Epithelial cadherin determines resistance to infectious pancreatic necrosis virus in Atlantic  
516 salmon. *Genetics* 200, 1313–1326.
- 517 NCBI (2018). Assembly information by organism. Available at:  
518 <https://www.ncbi.nlm.nih.gov/assembly/organism/8128/all/>.
- 519 Neira, R. (2010). Breeding in aquaculture species: genetic improvement programs in developing  
520 countries. in *Proceedings of the 9th World Congress on Genetics Applied to Livestock*  
521 *Production*.
- 522 Nielsen, H. M., Sonesson, A. K., Yazdi, H., and Meuwissen, T. H. E. (2009). Comparison of  
523 accuracy of genome-wide and BLUP breeding value estimates in sib based aquaculture  
524 breeding schemes. *Aquaculture* 289, 259–264. doi:10.1016/j.aquaculture.2009.01.027.
- 525 Ødegård, J., Moen, T., Santi, N., Korsvoll, S. A., Kjøglum, S., and Meuwissen, T. H. E. (2014).  
526 Genomic prediction in an admixed population of Atlantic salmon (*Salmo salar*). *Front.*  
527 *Genet.* 5.
- 528 Palaiokostas, C., Bekaert, M., Khan, M. G. Q., Taggart, J. B., Gharbi, K., McAndrew, B. J., et al.  
529 (2013). Mapping and Validation of the Major Sex-Determining Region in Nile Tilapia  
530 (*Oreochromis niloticus* L.) Using RAD Sequencing. *PLoS One* 8, e68389.  
531 doi:10.1371/journal.pone.0068389.
- 532 Poletto, A. B., Ferreira, I. A., Cabral-de-Mello, D. C., Nakajima, R. T., Mazzuchelli, J., Ribeiro,  
533 H. B., et al. (2010). Chromosome differentiation patterns during cichlid fish evolution. *BMC*  
534 *Genet* 11. doi:10.1186/1471-2156-11-50.
- 535 Rastas, P., Paulin, L., Hanski, I., Lehtonen, R., and Auvinen, P. (2013). Lep-MAP: fast and  
536 accurate linkage map construction for large SNP datasets. *Bioinformatics* 29, 3128–34.  
537 doi:10.1093/bioinformatics/btt563.
- 538 Robledo, D., Palaiokostas, C., Bargelloni, L., Martínez, P., and Houston, R. (2017). Applications  
539 of genotyping by sequencing in aquaculture breeding and genetics. *Rev. Aquac.*
- 540 Roesti, M., Moser, D., and Berner, D. (2013). Recombination in the threespine stickleback  
541 genome—patterns and consequences. *Mol. Ecol.* 22, 3014–3027.
- 542 Seale, A. P., Riley, L. G., Leedom, T. A., Kajimura, S., Dores, R. M., Hirano, T., et al. (2002).  
543 Effects of environmental osmolality on release of prolactin, growth hormone and ACTH  
544 from the tilapia pituitary. *Gen. Comp. Endocrinol.* 128, 91–101.
- 545 Shirak, A., Seroussi, E., Cnaani, A., Howe, A. E., Domokhovskiy, R., Zilberman, N., et al. (2006).  
546 *Amh* and *Dmrta2* genes map to tilapia (*Oreochromis* spp.) linkage group 23 within  
547 quantitative trait locus regions for sex determination. *Genetics* 174, 1573–1581.
- 548 Sonesson, A. K., and Meuwissen, T. H. E. (2009). Testing strategies for genomic selection in  
549 aquaculture breeding programs. *Genet. Sel. Evol.* 41, 37.
- 550 Tsai, H.-Y., Hamilton, A., Tinch, A. E., Guy, D. R., Gharbi, K., Stear, M. J., et al. (2015).  
551 Genome wide association and genomic prediction for growth traits in juvenile farmed  
552 Atlantic salmon using a high density SNP array. *BMC Genomics* 16, 969.
- 553 Vallejo, R. L., Leeds, T. D., Gao, G., Parsons, J. E., Martin, K. E., Evenhuis, J. P., et al. (2017).

- 554 Genomic selection models double the accuracy of predicted breeding values for bacterial  
555 cold water disease resistance compared to a traditional pedigree-based model in rainbow  
556 trout aquaculture. *Genet. Sel. Evol.* 49, 17.
- 557 Vallejo, R., Leeds, T., Liu, S., Gao, G., Welch, T., Wiens, G., et al. (2015). Accuracy of Genomic  
558 Prediction for BCWD Resistance in Rainbow trout Using Different Genotyping Platforms  
559 and Genomic Selection Models. in *Plant and Animal Genome Conference*, P726.
- 560 Varona, L., Legarra, A., Toro, M. A., and Vitezica, Z. G. (2018). Non-additive Effects in  
561 Genomic Selection. *Front. Genet.* 9, 78.
- 562 Vela-Avitúa, S., Meuwissen, T. H. E., Luan, T., and Ødegård, J. (2015). Accuracy of genomic  
563 selection for a sib-evaluated trait using identity-by-state and identity-by-descent  
564 relationships. *Genet. Sel. Evol.* 47, 9.
- 565 Vilela, D. A. R., Silva, S. G. B., Peixoto, M. T. D., Godinho, H. P., and França, L. R. (2003).  
566 Spermatogenesis in teleost: insights from the Nile tilapia (*Oreochromis niloticus*) model.  
567 *Fish Physiol. Biochem.* 28, 187–190.
- 568 Wang, L., Wan, Z. Y., Bai, B., Huang, S. Q., Chua, E., Lee, M., et al. (2015). Construction of a  
569 high-density linkage map and fine mapping of QTL for growth in Asian seabass. *Sci. Rep.* 5.
- 570 Wright, P. A., and Land, M. D. (1998). Urea production and transport in teleost fishes. *Comp.*  
571 *Biochem. Physiol. Part A Mol. Integr. Physiol.* 119, 47–54.
- 572
- 573
- 574 **13 Supplementary Material**
- 575 Supplementary file containing Supplementary Tables and Figures follows this manuscript.



Development of the Onil50 -array

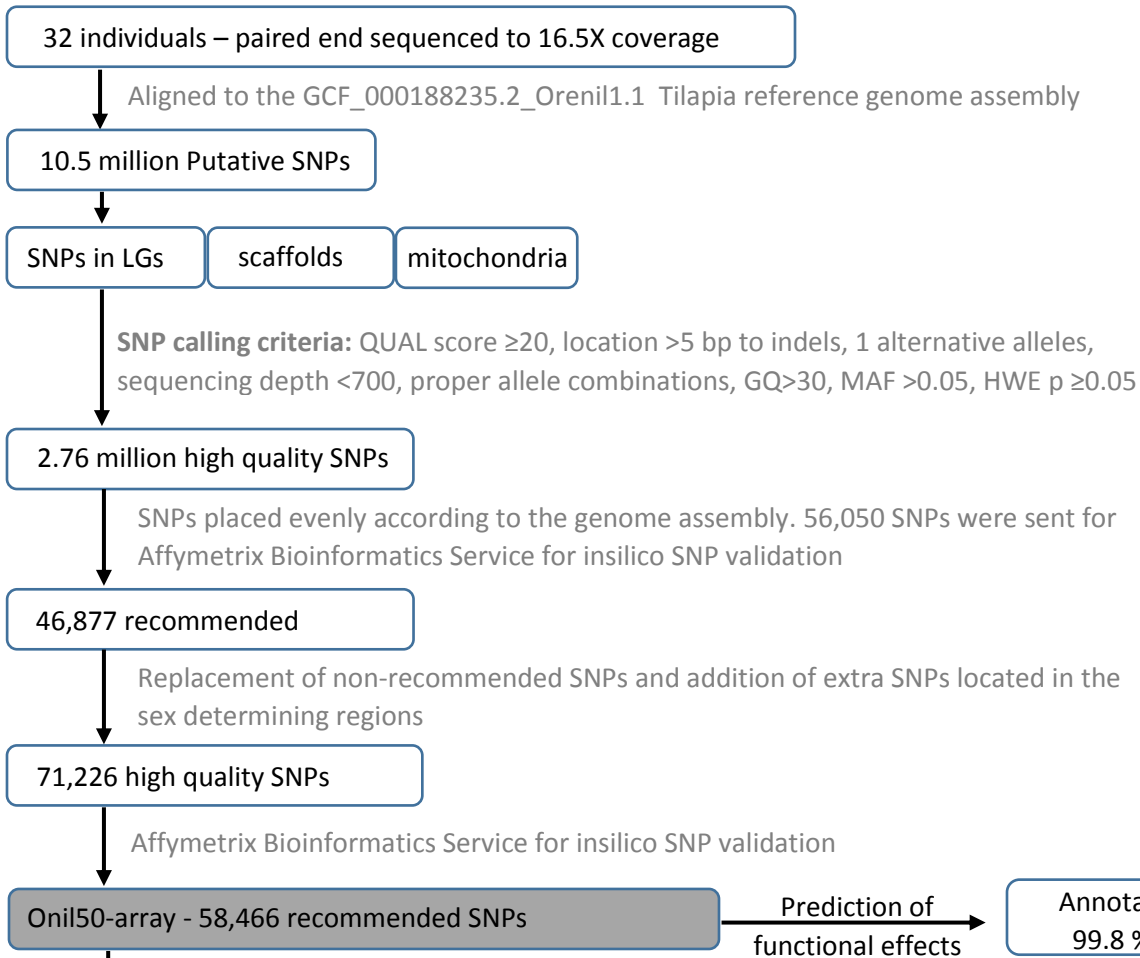

Construction of the Linkage Map

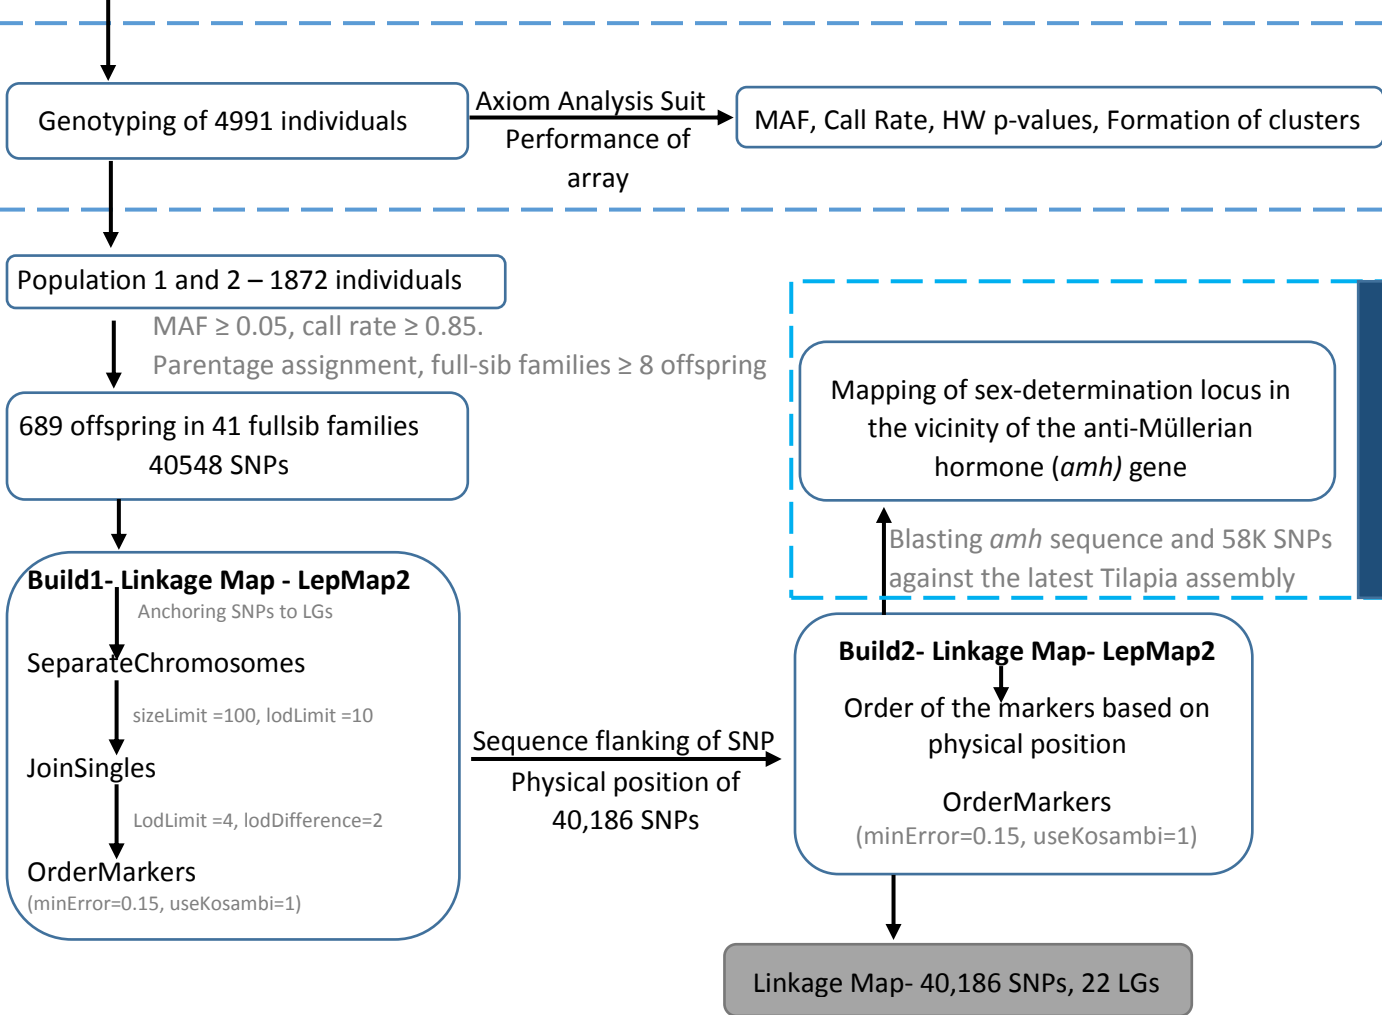

Sex determination

(a) Distribution of SNPs by HW p-values

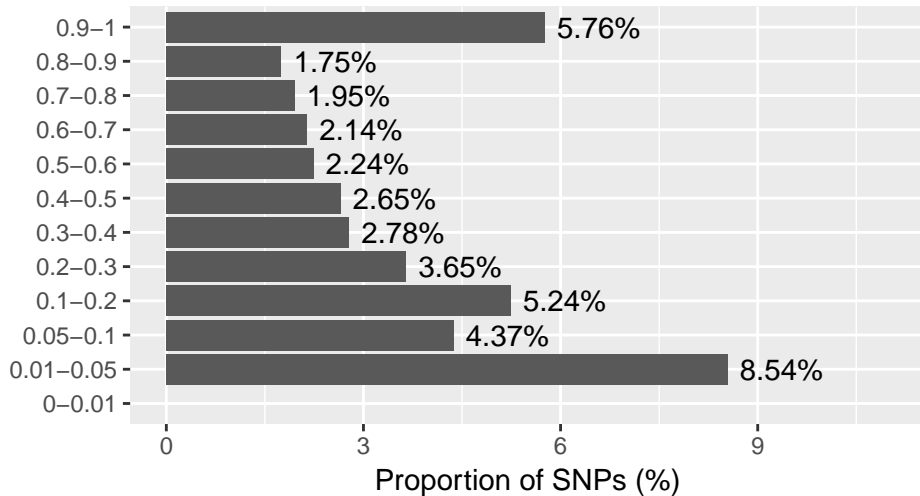

(b) Distribution of SNPs by call rate

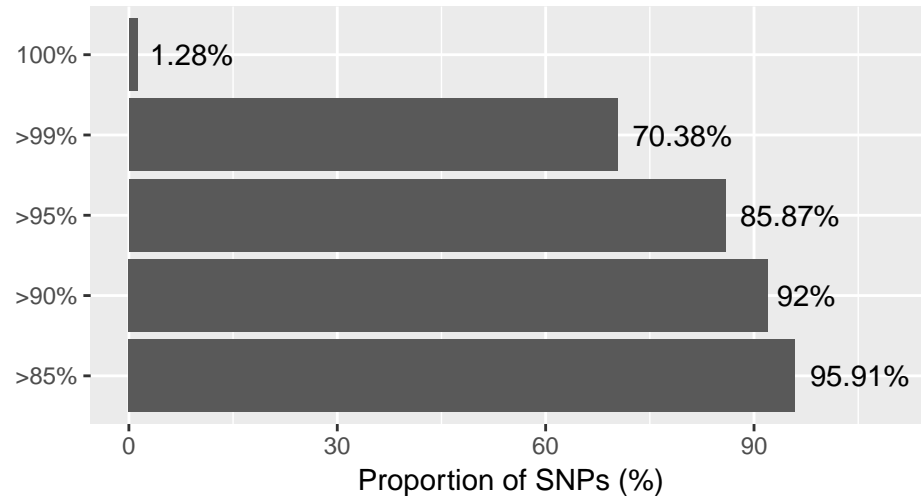

(c) Distribution of SNPs by MAF

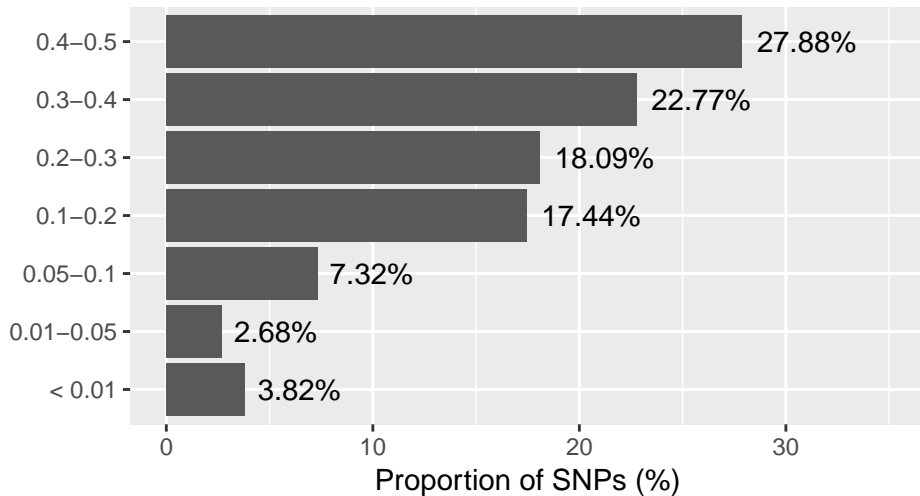

(d) Distribution of SNPs by quality

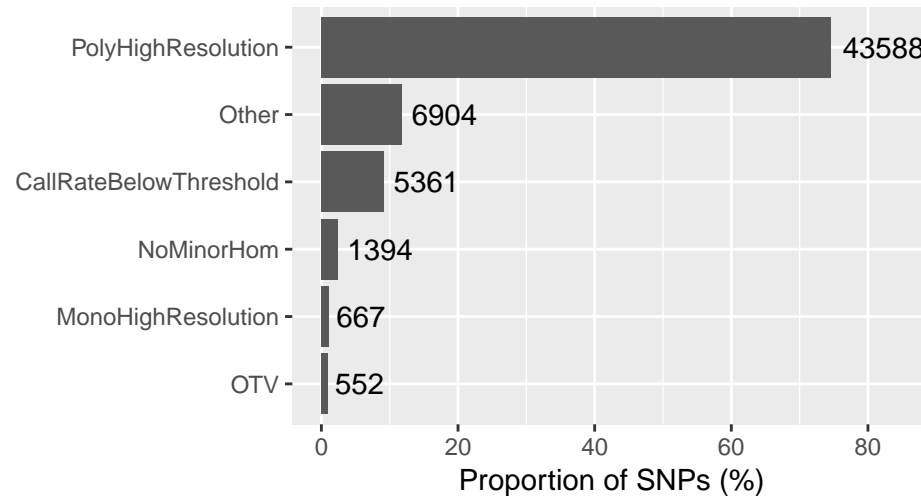

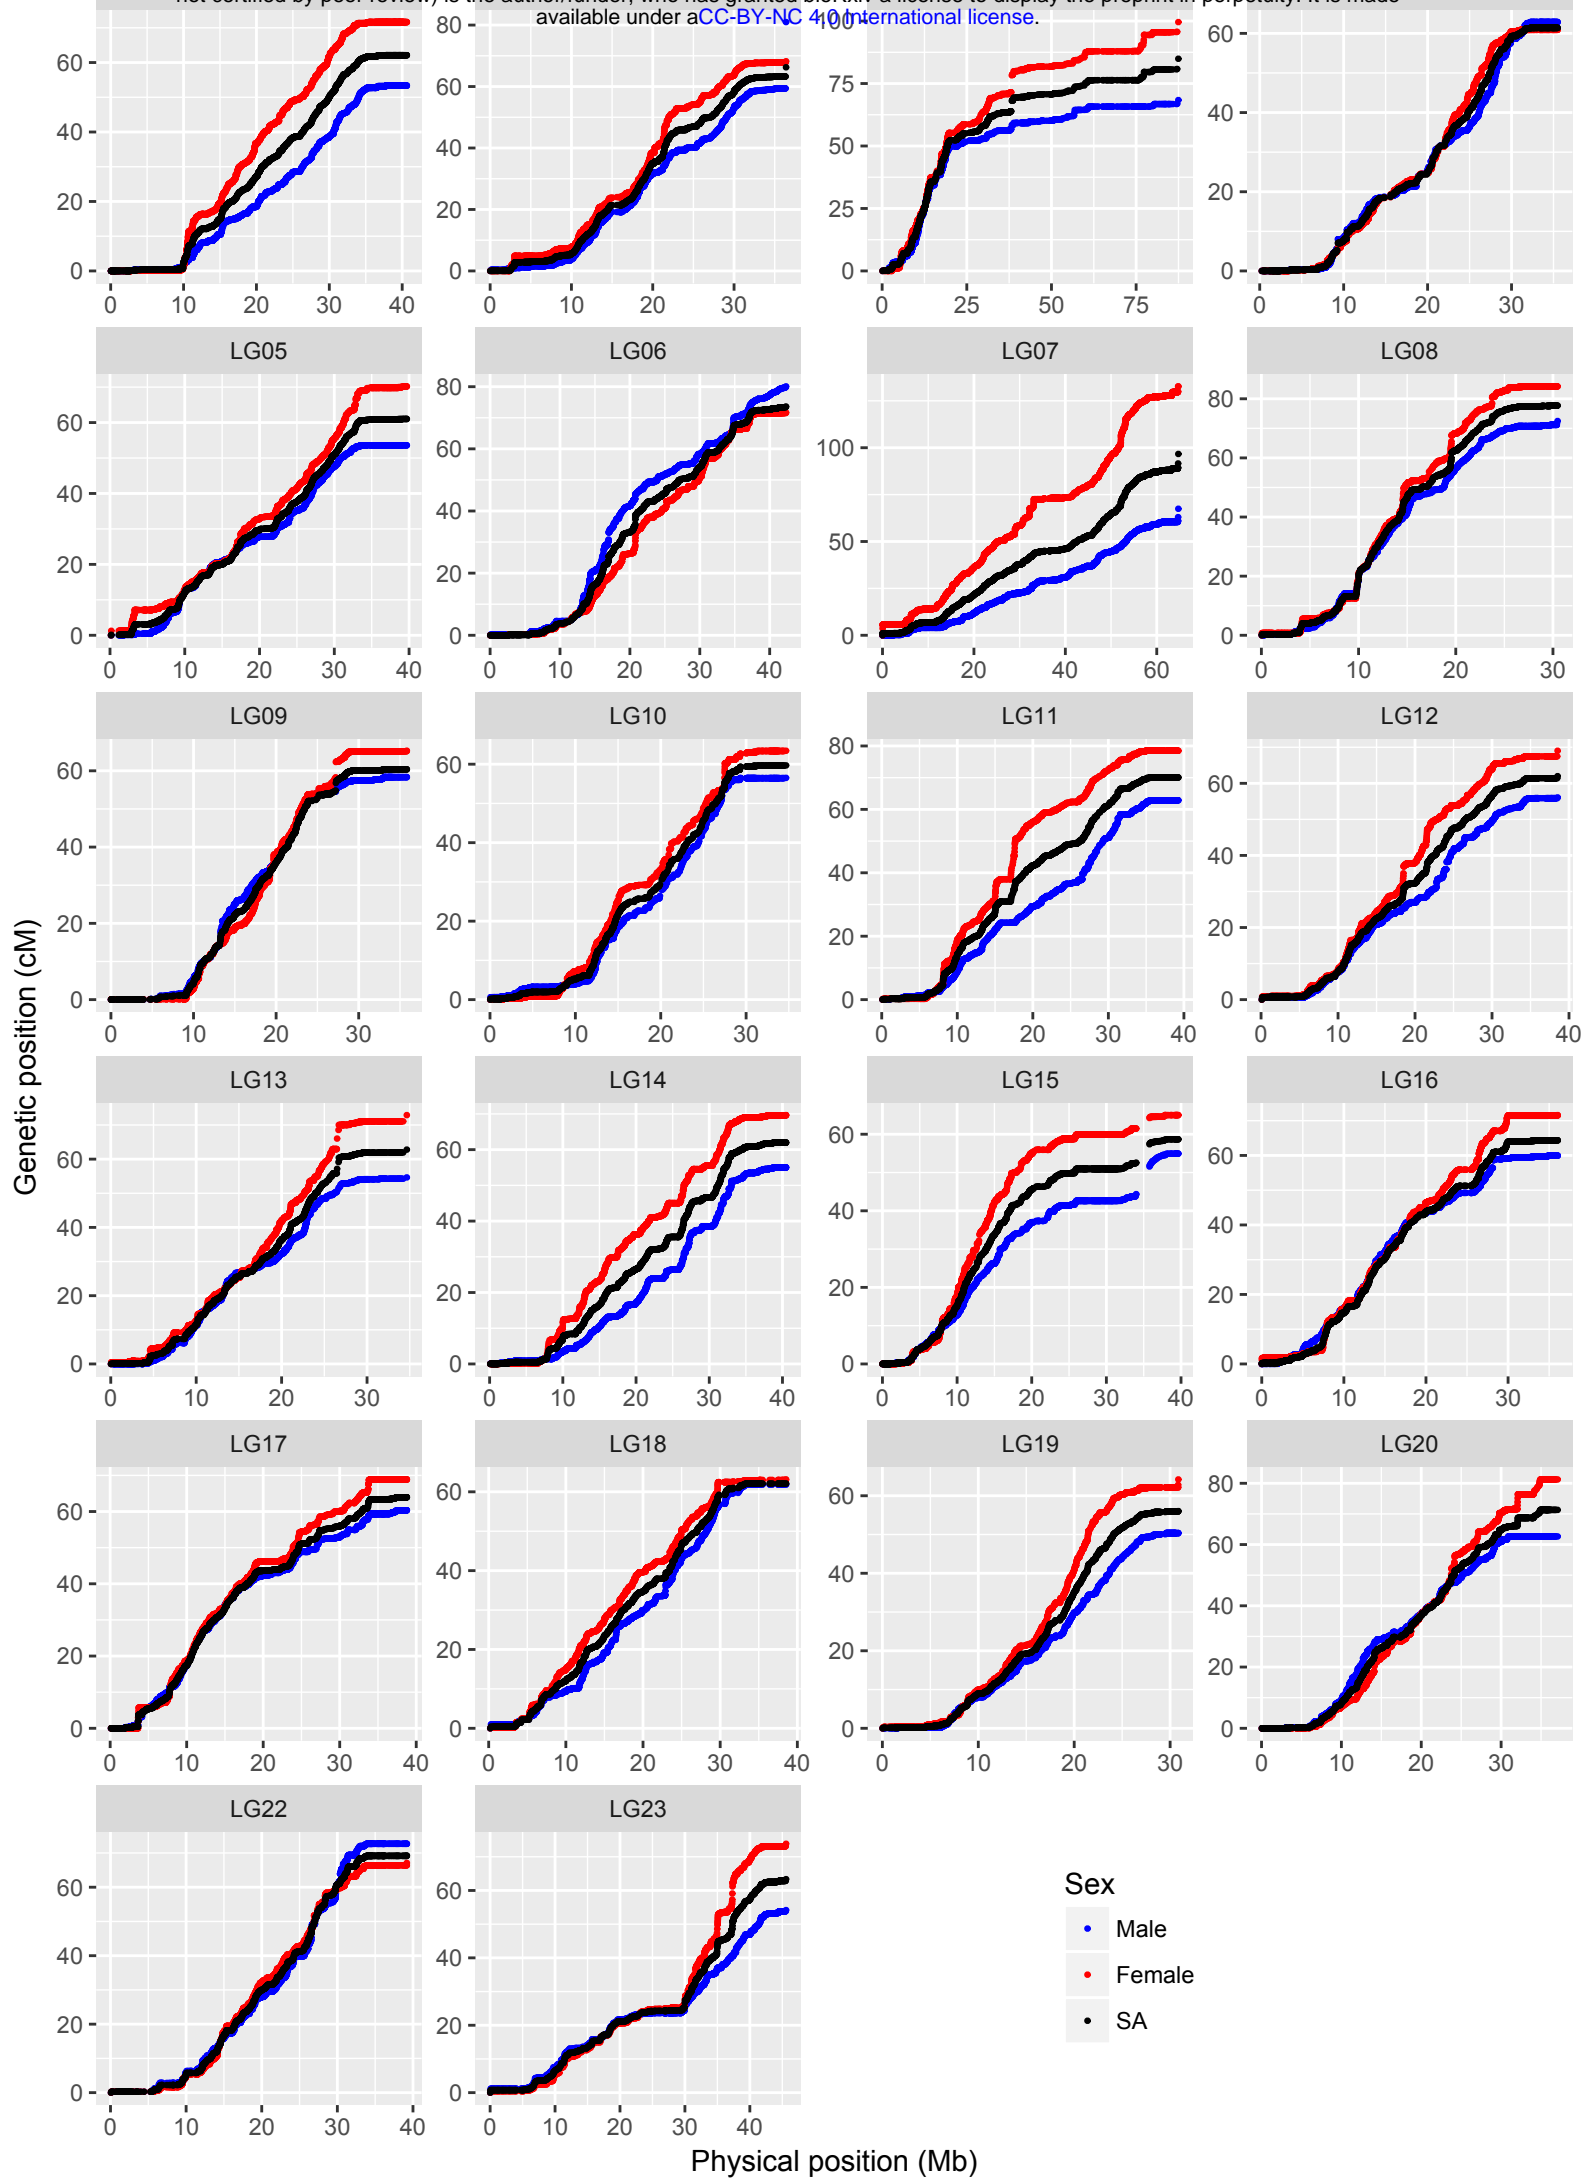

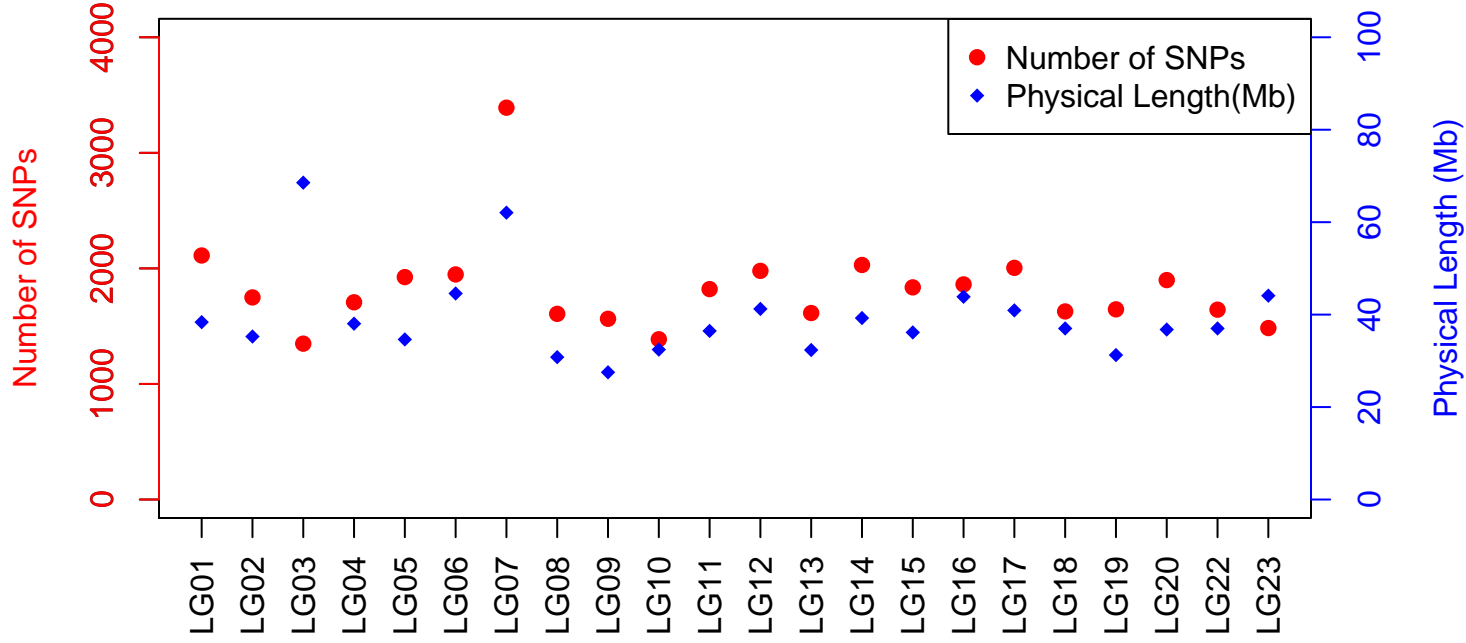

*Supplementary Material*

**Development and validation of 58K SNP-array and high-density linkage map in Nile tilapia (*O. niloticus*)**

**Rajesh Joshi<sup>1,\*</sup>, Mariann Árnýasi<sup>1</sup>, Sigbjørn Lien<sup>1</sup>, Hans Magnus Gjøen<sup>1</sup>, Alejandro Tola Alvarez<sup>2</sup>, Matthew Peter Kent<sup>1</sup>**

<sup>1</sup>Department of Animal and Aquacultural Sciences, Faculty of Biosciences, Norwegian University of Life Sciences, N-1432, Ås, Norway

<sup>2</sup>Genomar Genetics AS, Norway

\* **Correspondence:** Rajesh Joshi: [rajesh.joshi@nmbu.no](mailto:rajesh.joshi@nmbu.no)

**Supplementary Table 1:** Observations in each factorial mating in Population 1. 11 different sires (M1 to M11) are mated with 8 different dams (F1 to F8) in factorial manner. Only those full-sib families  $\geq 8$  offspring are shown.

|              | <b>F1</b> | <b>F2</b> | <b>F3</b> | <b>F4</b> | <b>F5</b> | <b>F6</b> | <b>F7</b> | <b>F8</b> | <b>Total</b> |
|--------------|-----------|-----------|-----------|-----------|-----------|-----------|-----------|-----------|--------------|
| <b>M1</b>    | 22        | 13        | 10        | -         | 8         | -         | -         | -         | <b>53</b>    |
| <b>M2</b>    | -         | -         | -         | 10        | -         | 21        | 10        | 24        | <b>65</b>    |
| <b>M3</b>    | -         | -         | -         | 12        | -         | 23        | 11        | 16        | <b>62</b>    |
| <b>M4</b>    | -         | -         | -         | 13        | -         | 9         | -         | -         | <b>22</b>    |
| <b>M5</b>    | 11        | 24        | 9         | -         | 8         | -         | -         | -         | <b>52</b>    |
| <b>M6</b>    | -         | -         | -         | -         | -         | 18        | 8         | 13        | <b>39</b>    |
| <b>M7</b>    | 19        | 12        | -         | -         | -         | -         | -         | -         | <b>31</b>    |
| <b>M8</b>    | -         | -         | -         | 14        | -         | 9         | 12        | 28        | <b>63</b>    |
| <b>M9</b>    | -         | 14        | -         | -         | 10        | -         | -         | -         | <b>24</b>    |
| <b>M10</b>   | 16        | 14        | 8         | -         | 8         | -         | -         | -         | <b>46</b>    |
| <b>M11</b>   | -         | -         | -         | 11        | -         | -         | -         | -         | <b>11</b>    |
| <b>Total</b> | <b>68</b> | <b>77</b> | <b>27</b> | <b>60</b> | <b>34</b> | <b>80</b> | <b>41</b> | <b>81</b> | <b>468</b>   |

**Supplementary Table 2:** Observations in different full-sib families in the Population 2

| <b>Dam</b>              | F9  | F10 | F11 | F12 | F13 | F14 | F15 | <b>Total</b> |
|-------------------------|-----|-----|-----|-----|-----|-----|-----|--------------|
| <b>Sire</b>             | M12 | M13 | M14 | M15 | M16 | M17 | M18 |              |
| <b>No. of offspring</b> | 22  | 24  | 26  | 36  | 37  | 37  | 39  | <b>221</b>   |

**Supplementary Table 3:** Published linkage maps for Tilapia species

| Species of Tilapia                                      |           | Map length (cM)                          | Marker number and type                                | Average marker interval (cM) | Authors & Year              |
|---------------------------------------------------------|-----------|------------------------------------------|-------------------------------------------------------|------------------------------|-----------------------------|
| <i>Oreochromis niloticus</i>                            |           | 704                                      | 62 microsatellites + 112 AFLP                         | -                            | (Kocher et al., 1998)       |
| <i>O. niloticus</i> X <i>O. aureus</i>                  |           | 1,311                                    | 525 microsatellite and 21 gene-based markers          | 2.4                          | (Lee et al., 2005)          |
| <i>O. niloticus</i>                                     |           | 34,084 cR <sub>3500</sub> and 937,310 kb | 1358 markers – radiation hybrid (RH) map              | 742 Kb                       | (Guyon et al., 2012)        |
| <i>O. niloticus</i>                                     |           | 1,176                                    | 3,802 SNPs                                            | 0.7                          | (Palaiokostas et al., 2013) |
| <i>O. mossambicus</i>                                   | Female    | 514                                      | 13 microsatellites and 49 AFLPs                       | 8.3                          | (Agresti et al., 2000)      |
|                                                         | Male      | 1632                                     | 60 microsatellites and 154 AFLPs                      | 7.6                          |                             |
| <i>O. mossambicus</i>                                   |           | 1042.5                                   | 301 markers                                           |                              |                             |
| <i>O. mossambicus</i> X <i>O. spp.</i> (Saline tilapia) | Consensus | 1067.6                                   | 401 microsatellites including 282 EST-derived markers | 3.3                          | (Liu et al., 2013)          |
|                                                         | Male      | 950.8                                    | 261 markers                                           | 3.6                          |                             |
|                                                         | Female    | 1030.6                                   | 261 markers                                           | 4                            |                             |
| Red tilapia                                             |           | 984.0                                    | 320 markers                                           | 3.1                          |                             |

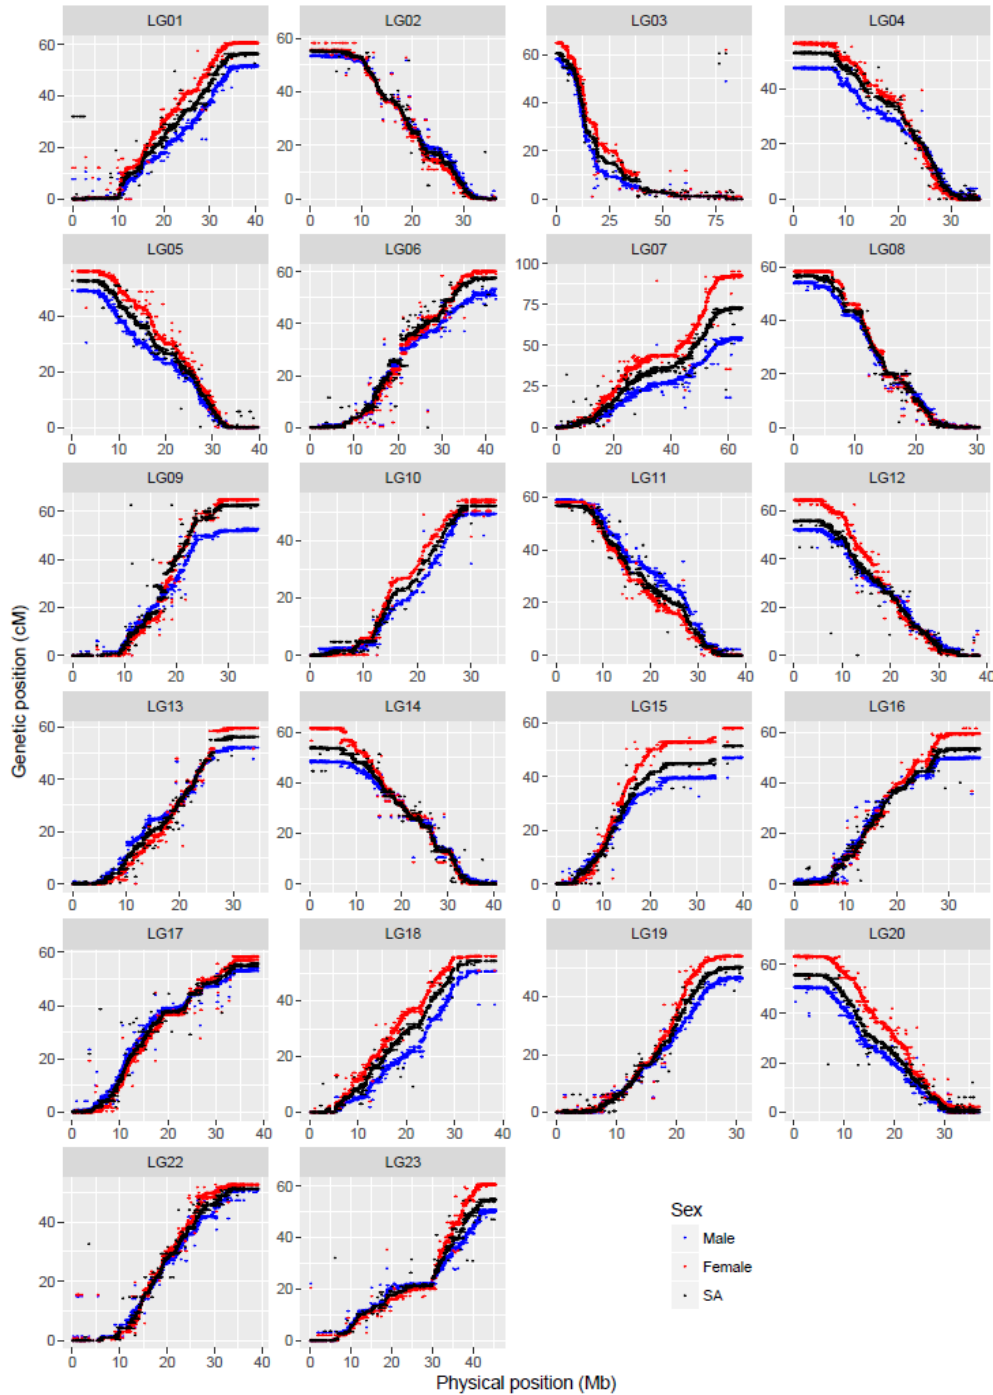

**Supplementary Figure 1:** Comparison of map positions between genetic and physical maps for different LGs in Build1 linkage map. The y-axis gives the linkage map positions, and the x-axis gives the physical positions. Linkage groups and the physical positions are based on *O. niloticus\_UMD1* Assembly. The maps are color-coded: red for female specific, blue for male specific and black for sex-averaged linkage maps. Inversion in maps shows that the genetic order is inverted.



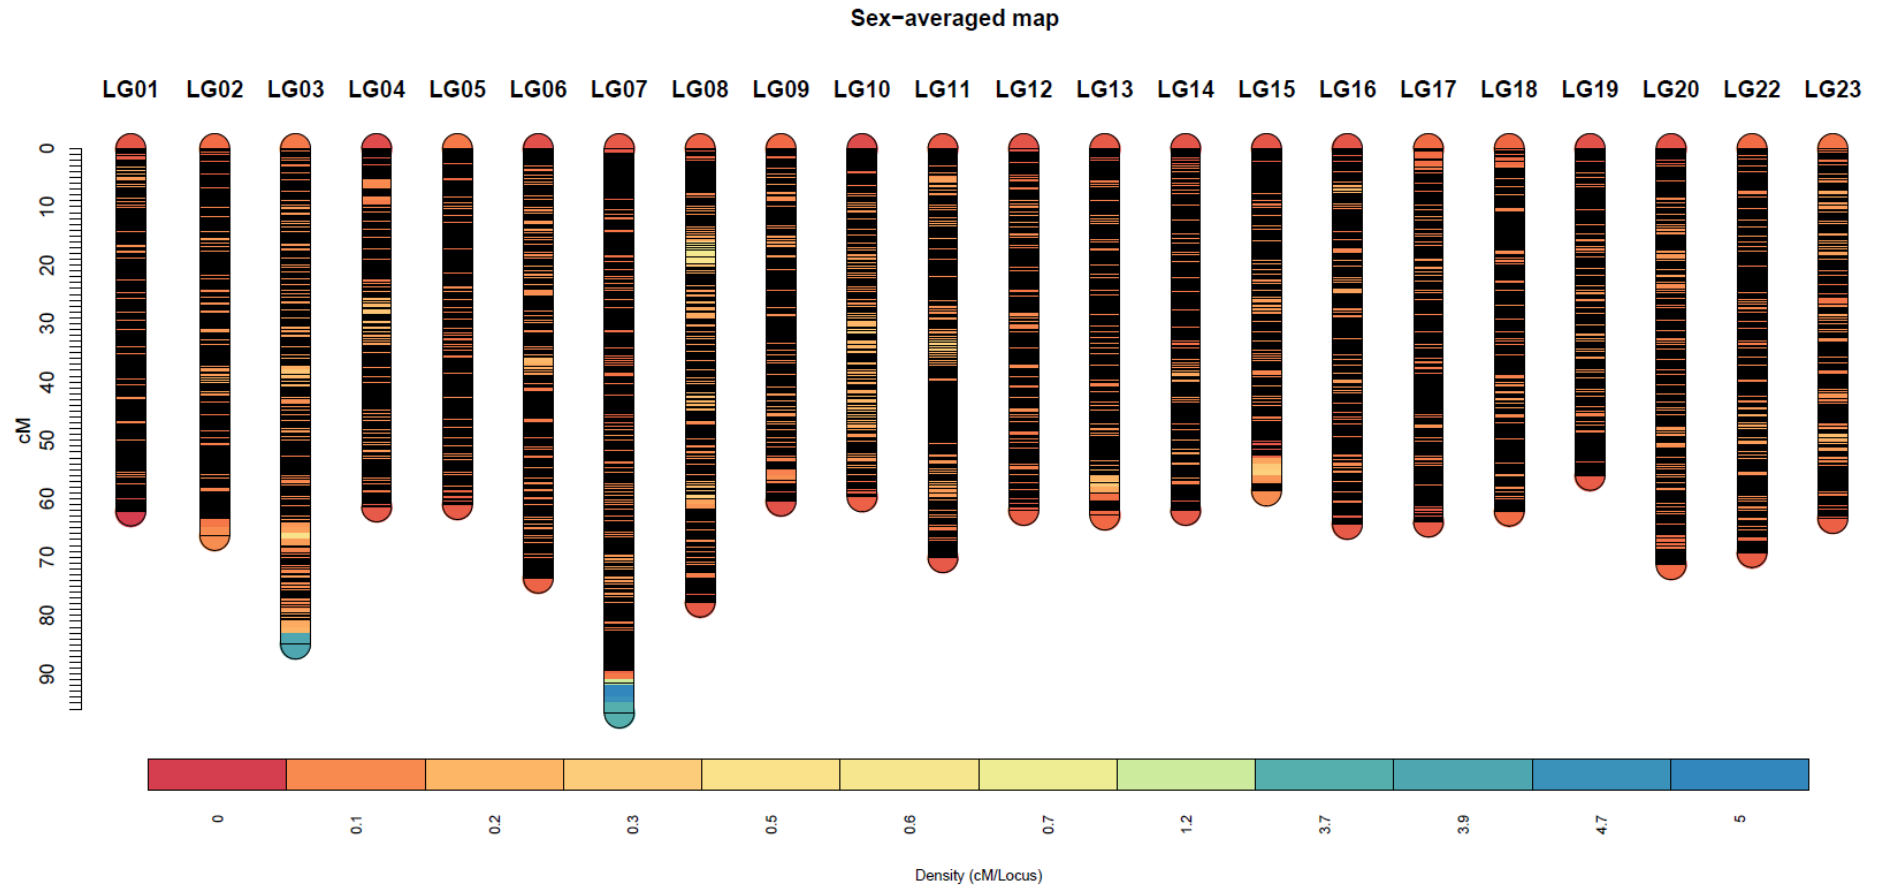

**Supplementary Figure 2:** The high-density consensus (sex-averaged) Build2 linkage map for Nile tilapia. The density is measured as cM/locus (higher the value, lower the number of markers in that locus)

58K SNP-array and high density linkage map for tilapia

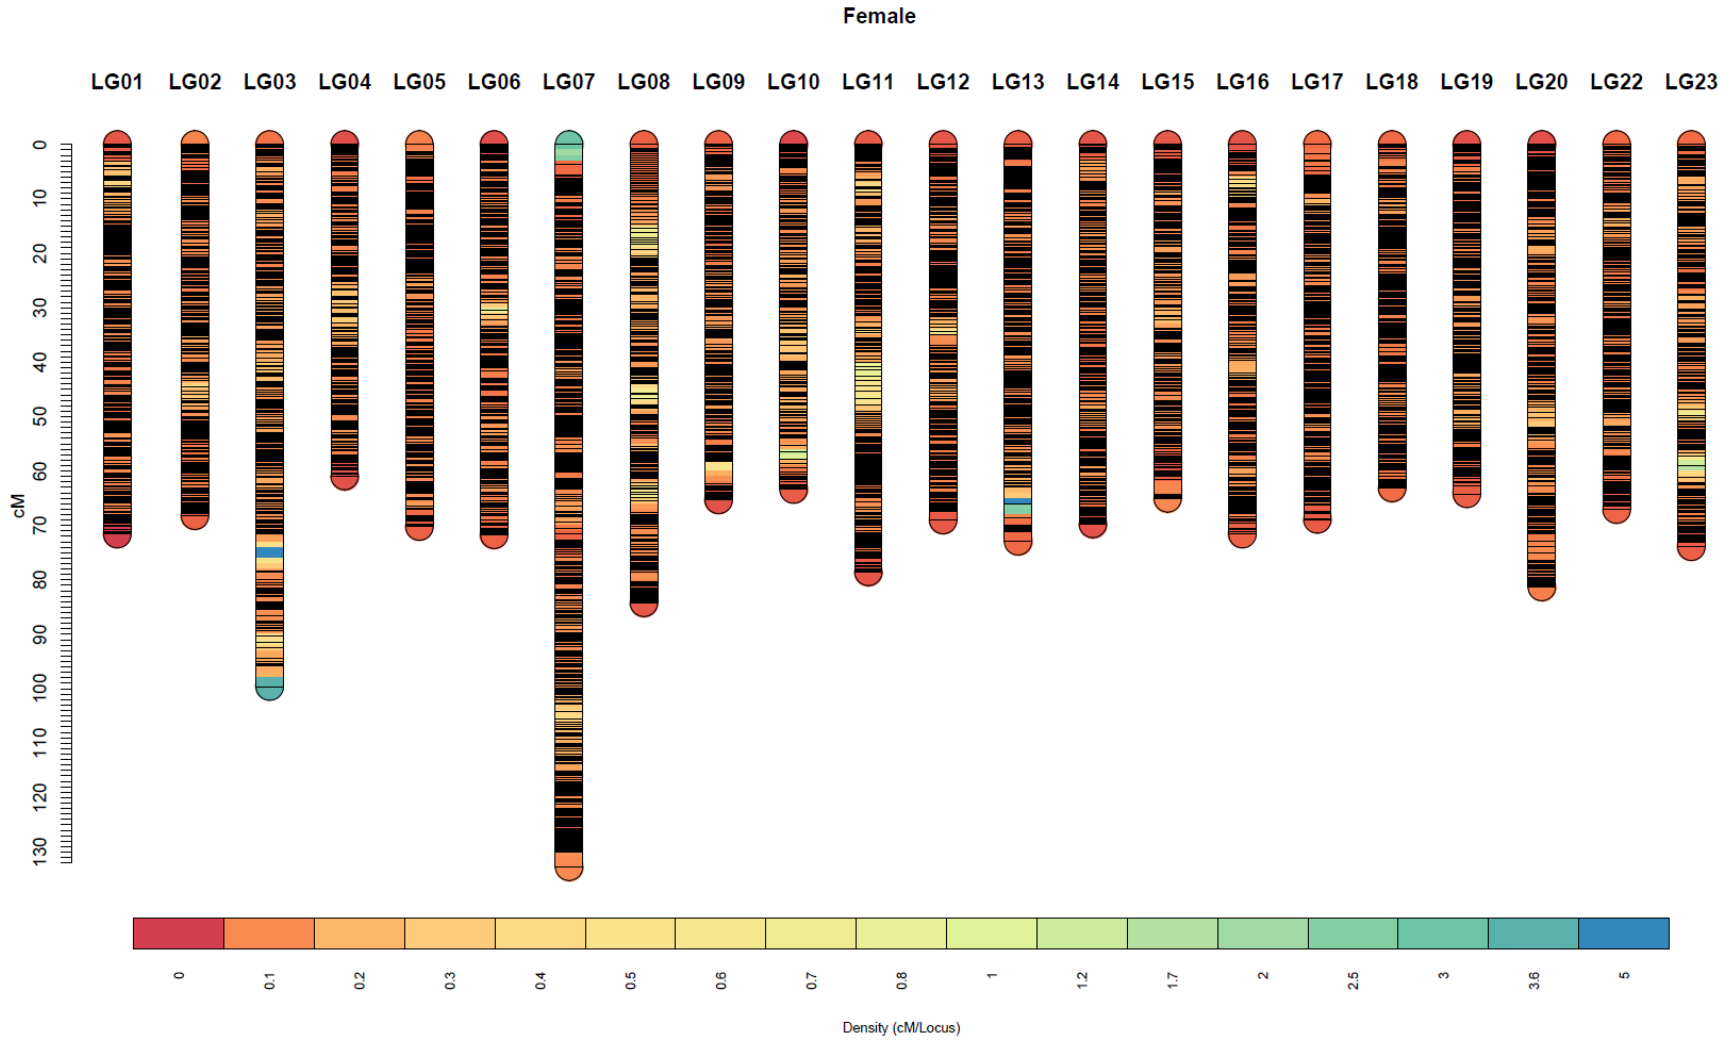

**Supplementary Figure 3:** The high-density female sex specific Build2 linkage map of Nile tilapia. The density is measured as cM/locus (higher the value, lower the number of markers in that locus)

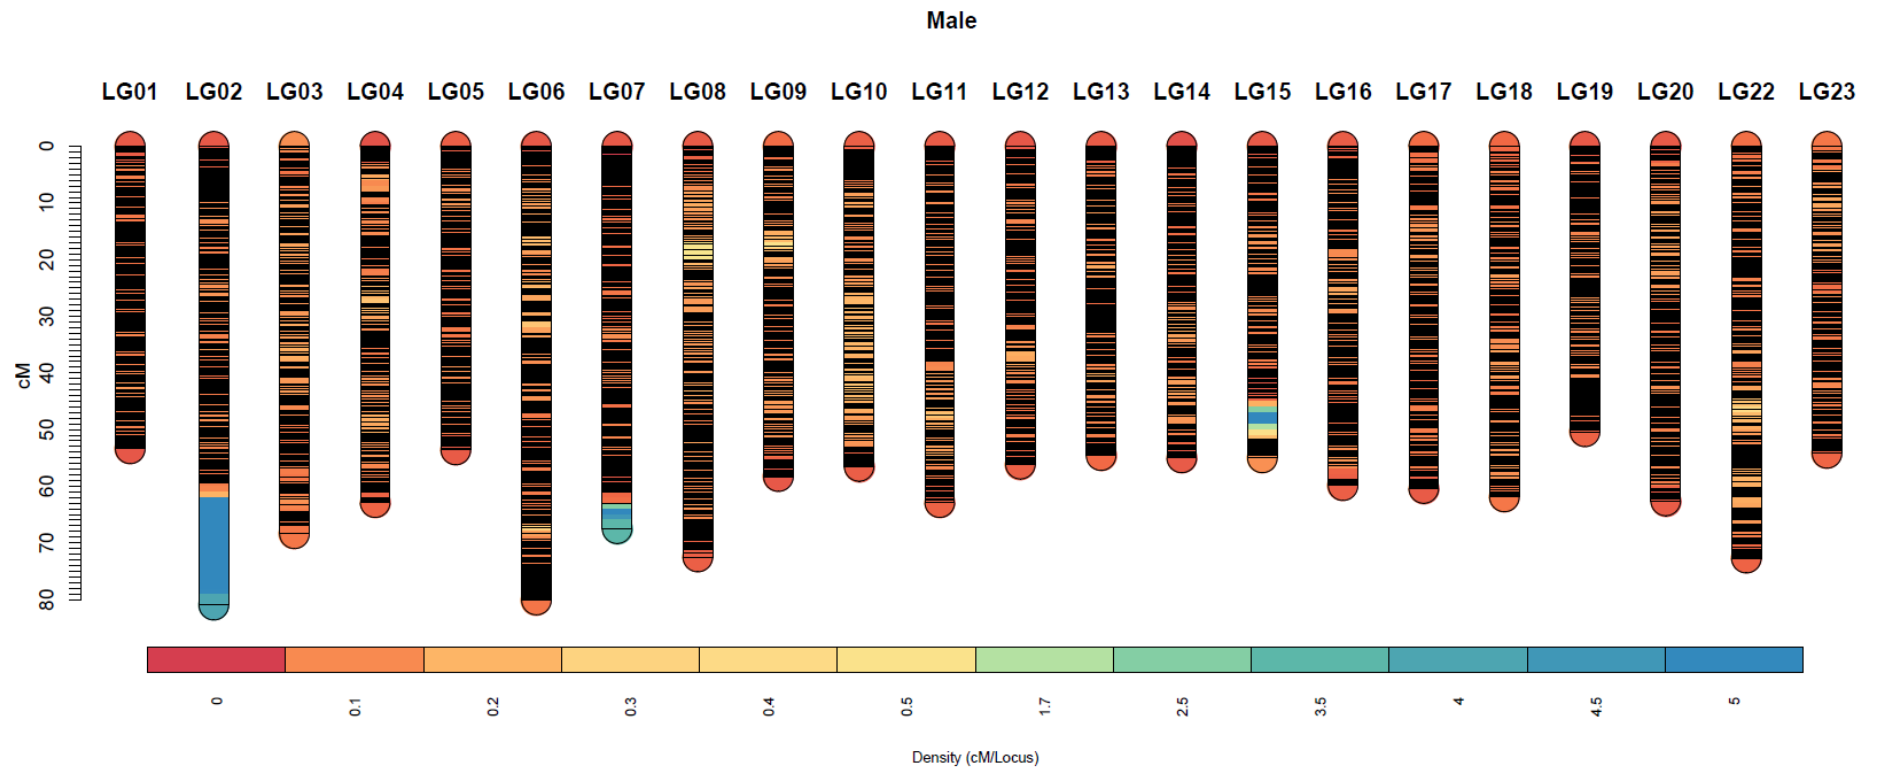

**Supplementary Figure 4:** The high-density male sex specific Build2 linkage map of Nile tilapia. The density is measured as cM/locus (higher the value, lower the number of markers in that locus)
